# Supplementary material for: NBEAL2 deficiency in humans leads to low CTLA-4 expression in activated conventional T cells
Source: PubMed Central journal article supplement (PMC10287742; doi:10.1038/s41467-023-39295-7), 2023-06-22
Supplement: 41467_2023_39295_MOESM1_ESM.pdf [file 41467_2023_39295_MOESM1_ESM.pdf]

1 **Supplementary information: NBEAL2 deficiency in humans leads to**  
2 **low CTLA-4 expression in activated conventional T cells**

3

4

5 **Supplementary Information**

6 This PDF includes:

7 Supplementary Figures S1 to S12.

8 Supplementary Tables S1 to S9.

9 Supplementary methods.

10 **Supplementary figures:**

11 **Supplementary Figure 1. Family trees of the cohort and Vitamin B12 and FasL assays**

12

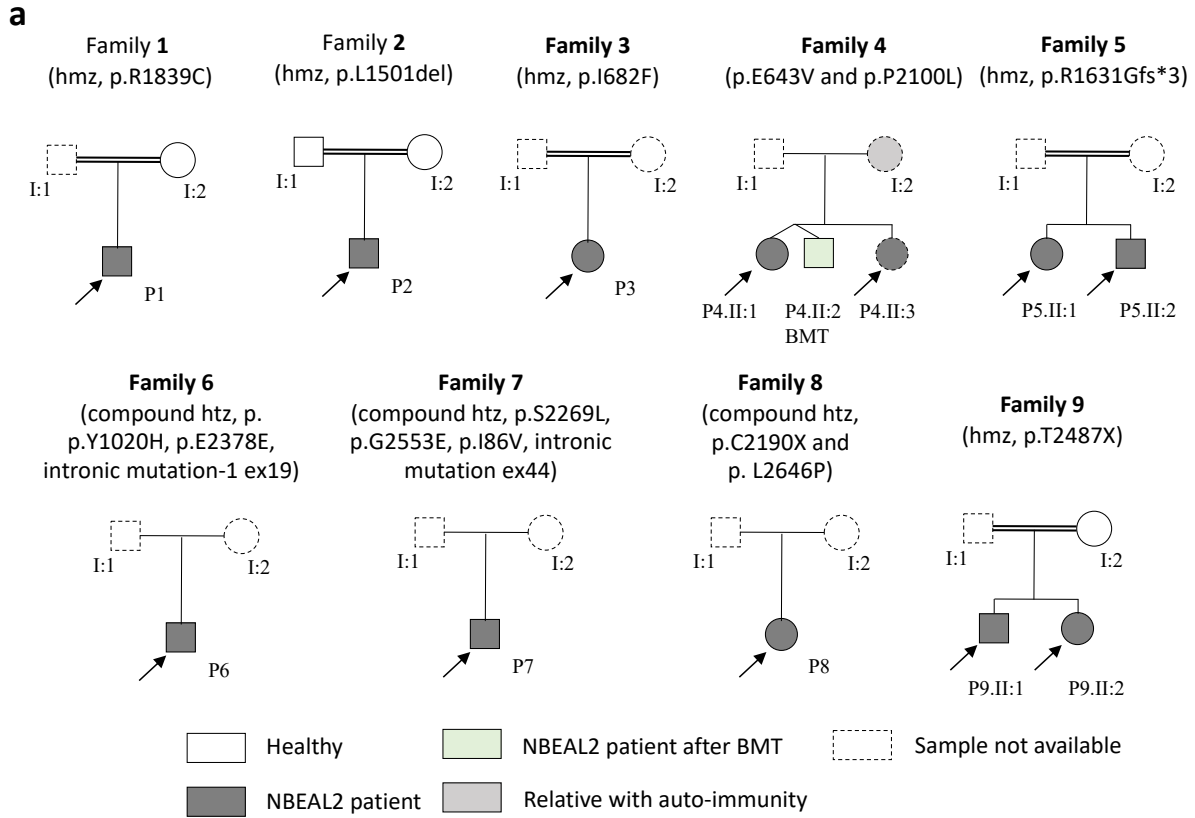

**b Vitamin B12 in plasma**

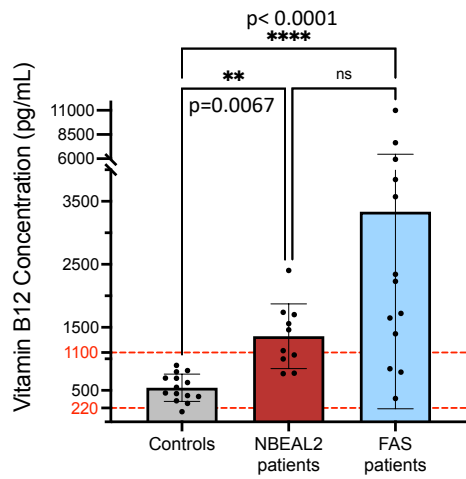

**c FasL in plasma**

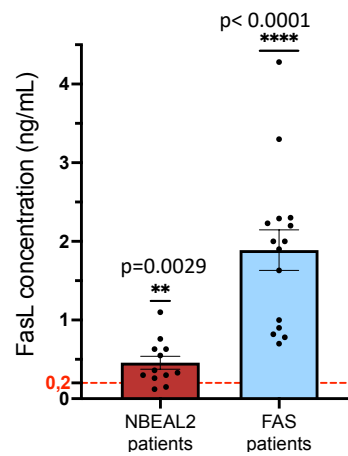

13

14

15 **Supplementary Figure 2. CyTOF analyses – clustering and immune phenotype of GPS**  
 16 **patients.**

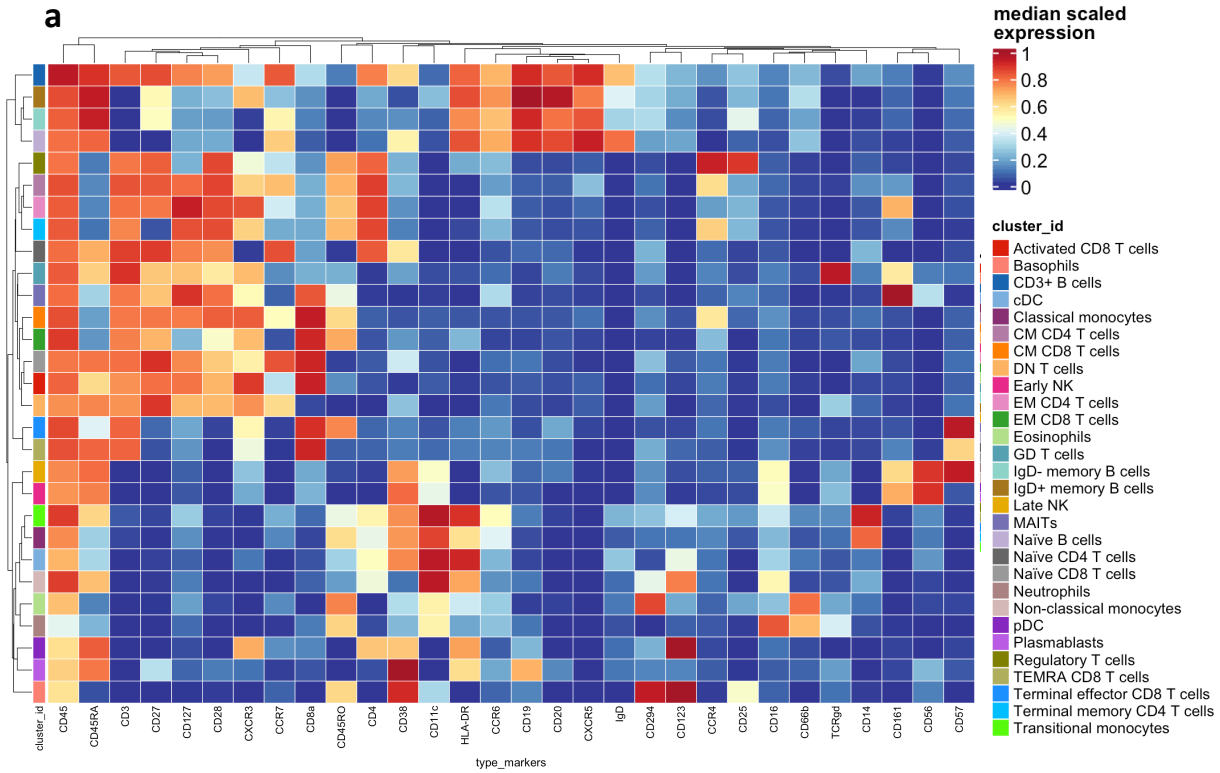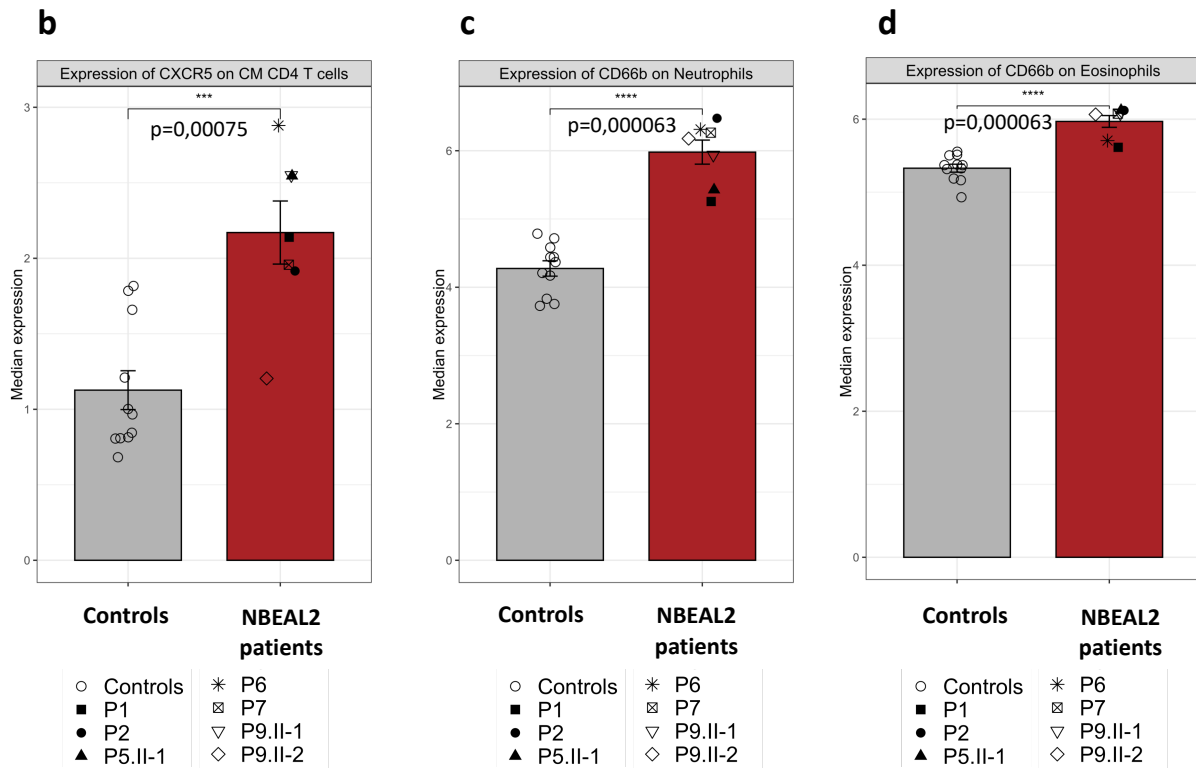

18 **Supplementary Figure 2. CyTOF analyses – clustering and immune phenotype of GPS**  
19 **patients. (a)** Heatmap of intensities for each lineage marker used for cluster identification after  
20 unsupervised clustering for all samples. **(b)** Expression of CXCR5 in central memory (CM) CD4+  
21 T cells from controls (N=11) and GPS patients (N= 7, NBEAL2 group). Each dot corresponds to  
22 a donor. Mean +/-SD is represented. These data were obtained after CyTOF experiment,  
23 performed once for each sample. Two-tailed p-values were determined with a nonparametric  
24 Mann-whitney test. (\*) p-value < 0.05; (\*\*) p-value < 0.01 ; (\*\*\*) p-value < 0.005 ; (\*\*\*\*) p-value <  
25 0.0001. **(c)** Expression of CD66b on neutrophils from controls (N=11) and GPS patients (N=7,  
26 NBEAL2 group). Each dot corresponds to a donor. Mean +/-SD is represented. These data were  
27 obtained after CyTOF experiment, performed once for each sample. Two-tailed p-values were  
28 determined with a nonparametric Mann-whitney test. (\*) p-value < 0.05; (\*\*) p-value < 0.01 ; (\*\*\*)  
29 p-value < 0.005 ; (\*\*\*\*) p-value < 0.0001. **(d)** Expression of CD66b on eosinophils from controls  
30 (N=11) and GPS patients (N=7, NBEAL2 group. Each dot corresponds to a donor. Mean +/-SD is  
31 represented. These data were obtained after CyTOF experiment, performed once for each  
32 sample. Two-tailed p-values were determined with a nonparametric Mann-whitney test. (\*) p-value  
33 < 0.05; (\*\*) p-value < 0.01 ; (\*\*\*) p-value < 0.005 ; (\*\*\*\*) p-value < 0.0001.

34

35



36 **Supplementary Figure 3. Mass spectrometry analyses – strategy of proteins selection.**

**Samples from the interactome**  
*Ctrl1*  
*Ctrl2*  
*GPS1 = Patient P7*  
*GPS2 : KO NBEAL2 = Patient P6*

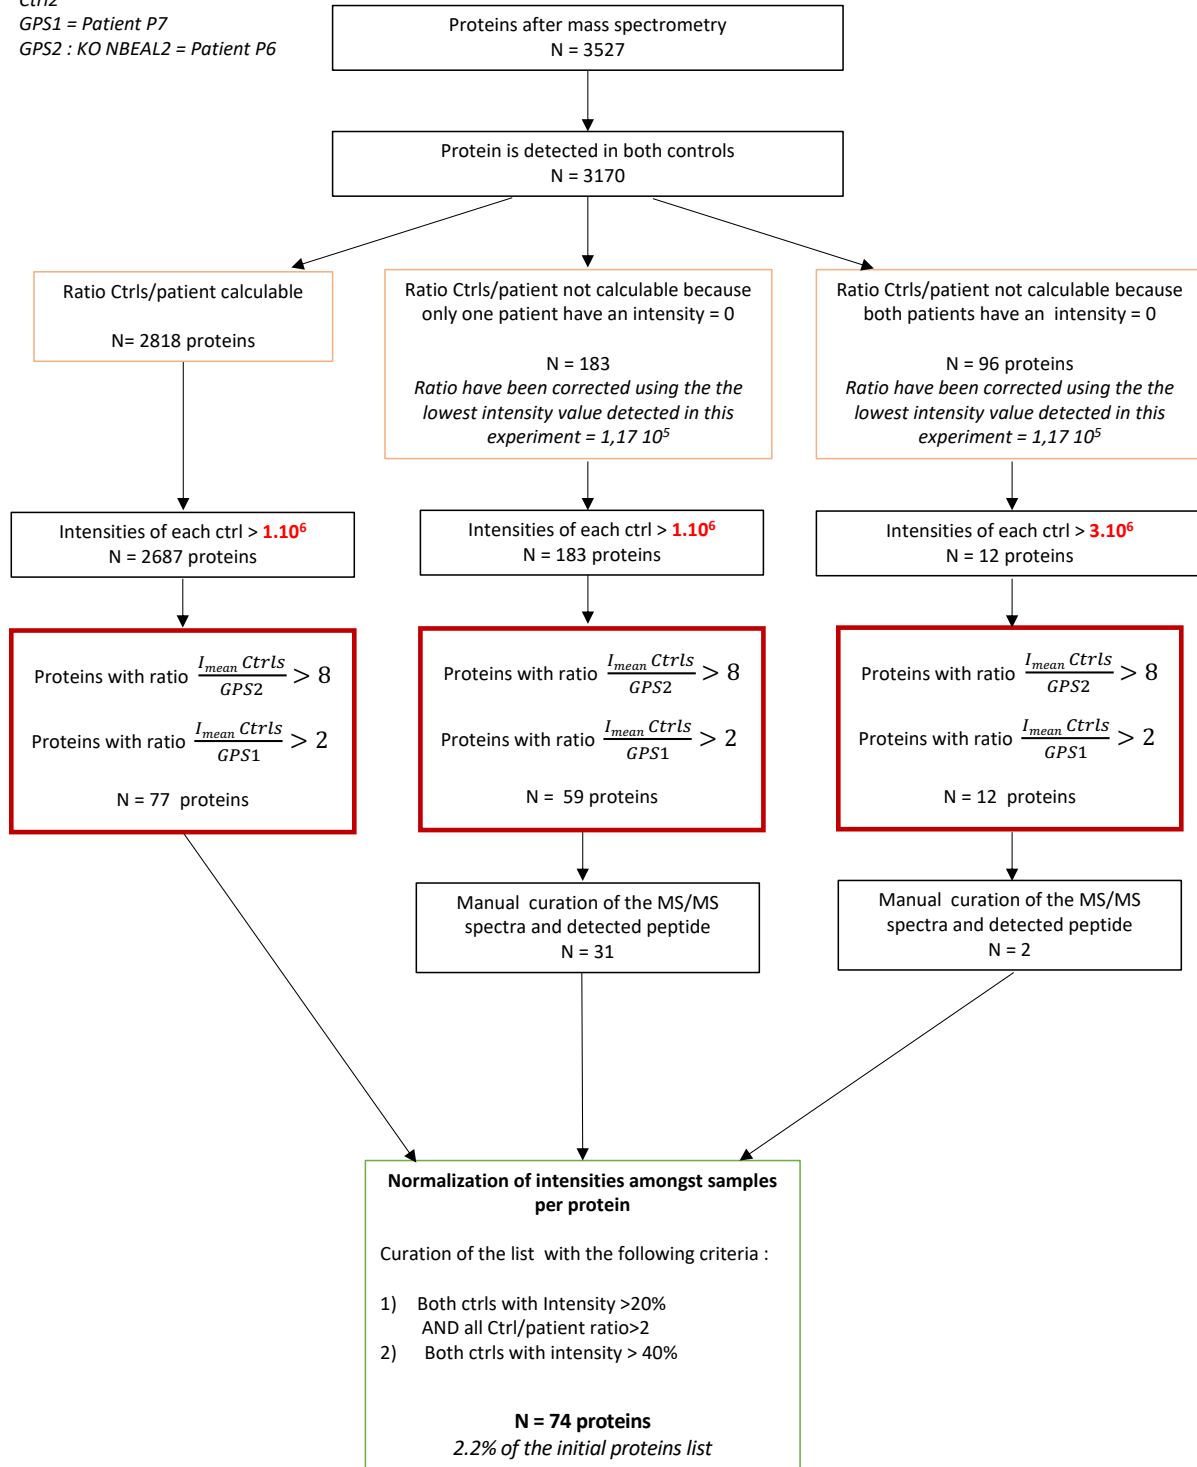

38 **Supplementary Figure 3. Mass spectrometry analyses – strategy of proteins selection.**  
39 Strategy of selection of the 74 partners of NBEAL2 obtained from the interactome by mass  
40 spectrometry analysis.

41 **Supplementary Figure 4. Treg staining**

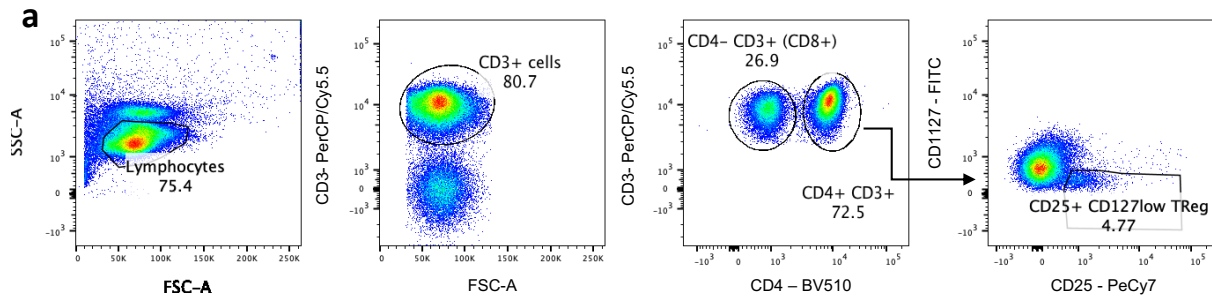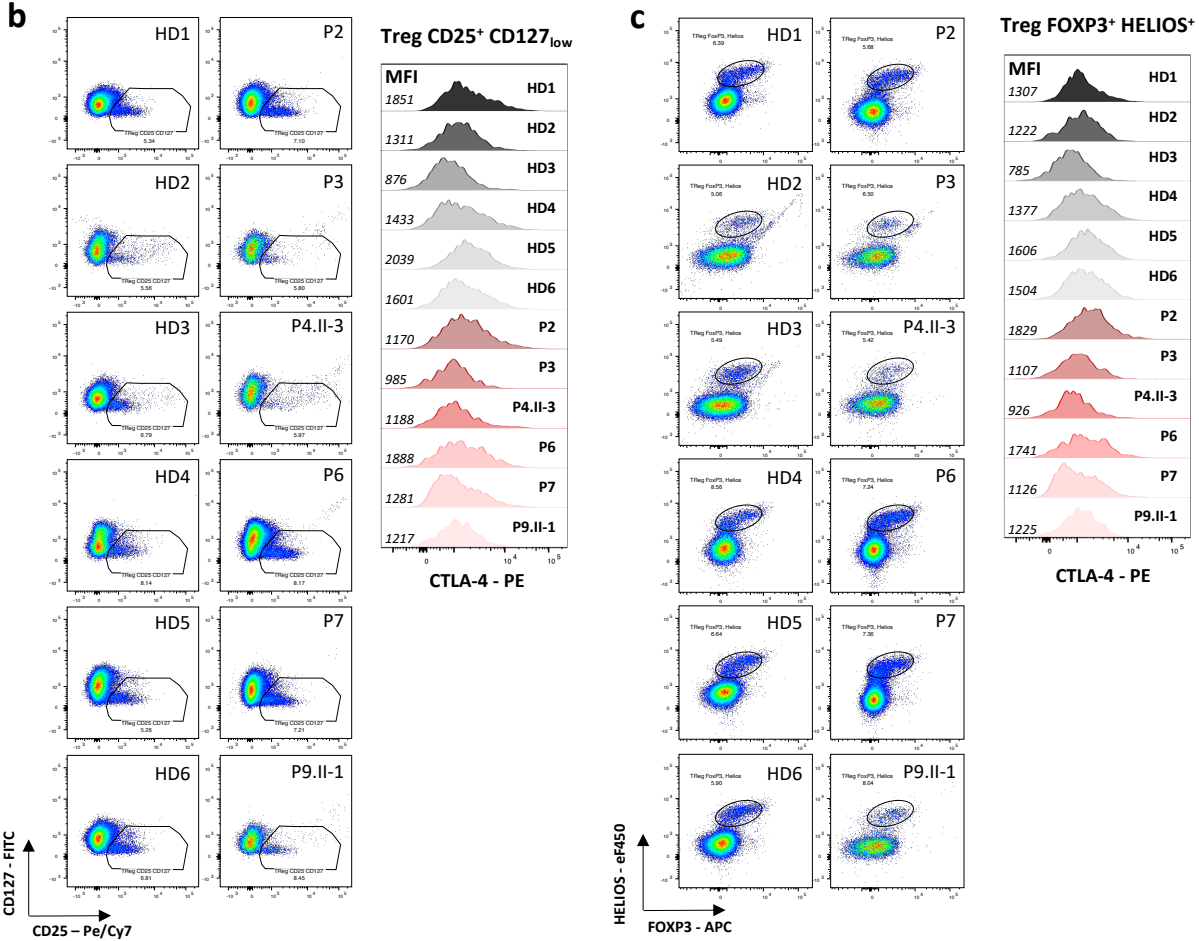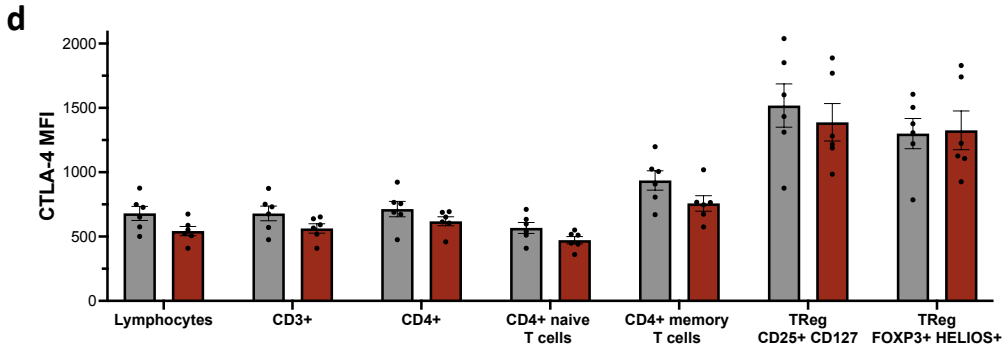

43 **Supplementary Figure 4. Tregs staining. (a)** Gating strategy to identify Tregs in unstimulated  
44 PBMC. After gating on lymphocytes, CD3<sup>+</sup> T cells, then CD4<sup>+</sup> T cells were selected. Tregs are  
45 defined among CD4<sup>+</sup> T cells by CD25<sup>+</sup> CD127<sub>low</sub> staining. **(b)** Dot plots of CD4<sup>+</sup> Tregs defined by  
46 CD25<sup>+</sup> CD127<sub>low</sub> staining, for tested patients and controls. Histograms of CTLA-4 staining and  
47 mean of fluorescence intensity (MFI) value of CTLA-4 per sample. **(c)** Dot plots of CD4<sup>+</sup> Tregs  
48 defined by FOXP3<sup>+</sup> HELIOS<sup>+</sup> staining, for tested patients and controls. Histograms of CTLA-4  
49 staining and mean of fluorescence intensity (MFI) value of CTLA-4 per sample. **(d)** Mean of  
50 fluorescence intensity (MFI) values of CTLA-4 for lymphocytes, CD3<sup>+</sup> cells, CD4<sup>+</sup> T cells, naïve  
51 CD45RA<sup>+</sup> CD4<sup>+</sup> T cells, memory CD45RA<sup>-</sup> CD4<sup>+</sup> T cells, CD25<sup>+</sup> CD127<sub>low</sub> Treg and FOXP3<sup>+</sup>  
52 HELIOS<sup>+</sup> Treg for controls (N=6) and NBEAL2 patients (N=6). Each dot corresponds to an  
53 independent sample. Staining experiment was performed once. Mean +/-SEM is represented.

54

55

56 **Supplementary Figure 5: activated T cells - gating strategy**

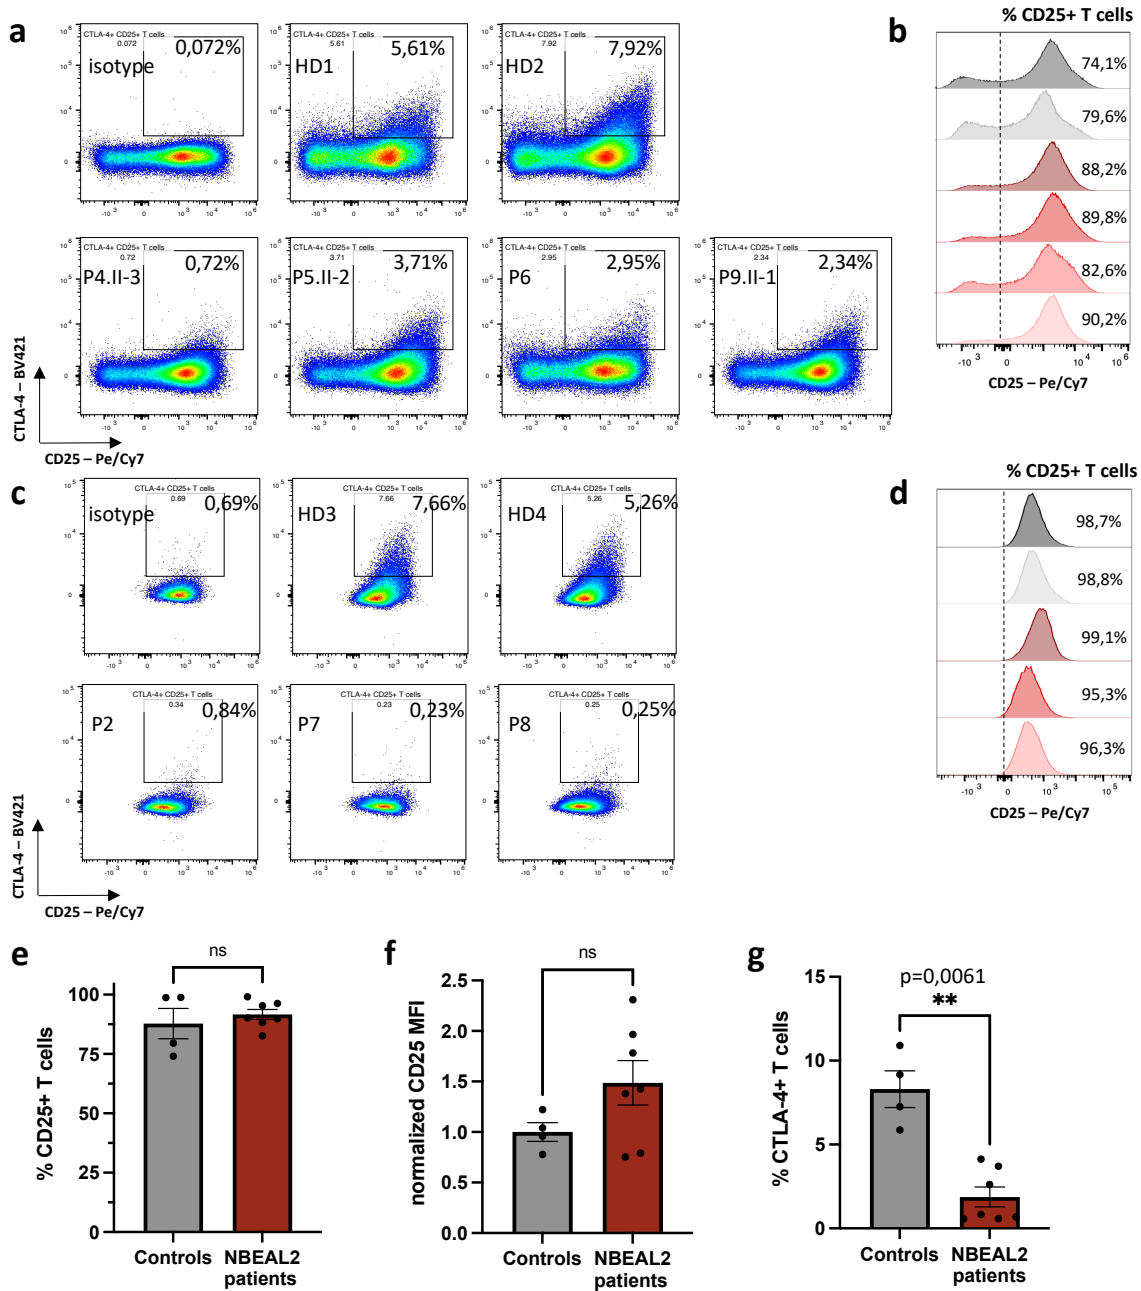

57

58 **Supplementary Figure 5: activated T cells - gating strategy.** (a) Gating strategy to define  
 59 CTLA-4 CD25 positive T cells after activation. The gating was tuned using a control isotype  
 60 antibody. Dot plots of CTLA-4 versus CD25 of activated T cells, for tested patients and controls  
 61 in a first experiment are shown. Percentages are indicated on the top. (b) Histograms of CD25  
 62 staining and percentage of CD25<sup>+</sup> activated T cells per sample. (c) Gating strategy to define  
 63 CTLA-4 CD25 positive T cells after activation. The gating was tuned using a control isotype  
 64 antibody. Dot plots of CTLA-4 versus CD25 of activated T cells, for tested patients and controls  
 65 in a second experiment are shown. Percentages are indicated on the top. (d) Histograms of CD25

66 staining and percentage of CD25<sup>+</sup> activated T cells per sample. **(e)** Percentage of CD25<sup>+</sup> activated  
67 T cells of controls (N=4) or NBEAL2 patients (N=7) activated T cells. Mean +/-SEM is represented.  
68 According to a two-tailed unpaired nonparametric Mann-Whitney test, there is no significant (ns)  
69 difference between the two groups. **(f)** Mean of fluorescence intensity (MFI) of CD25 in activated  
70 T cells of controls (N=4) or NBEAL2 patients (N=7). Mean +/-SEM is represented. According to a  
71 two-tailed unpaired nonparametric Mann-Whitney test, there is no significant (ns) difference  
72 between the two groups. **(g)** Percentage of activated T cells expressing CTLA-4 following TCR  
73 activation for controls (N=4) or NBEAL2 patients (N=7). Mean +/-SEM is represented. Two-tailed  
74 p-value is determined with a nonparametric Mann-Whitney test. (\*) p-value < 0.05; (\*\*) p-value <  
75 0.01 ; (\*\*\*) p-value < 0.005 ; (\*\*\*\*) p-value < 0.0001.

76

77

78 **Supplementary Figure 6: NBEAL2 and LRBA expression in sorted Tregs and conventional**  
 79 **T cells from healthy donors**

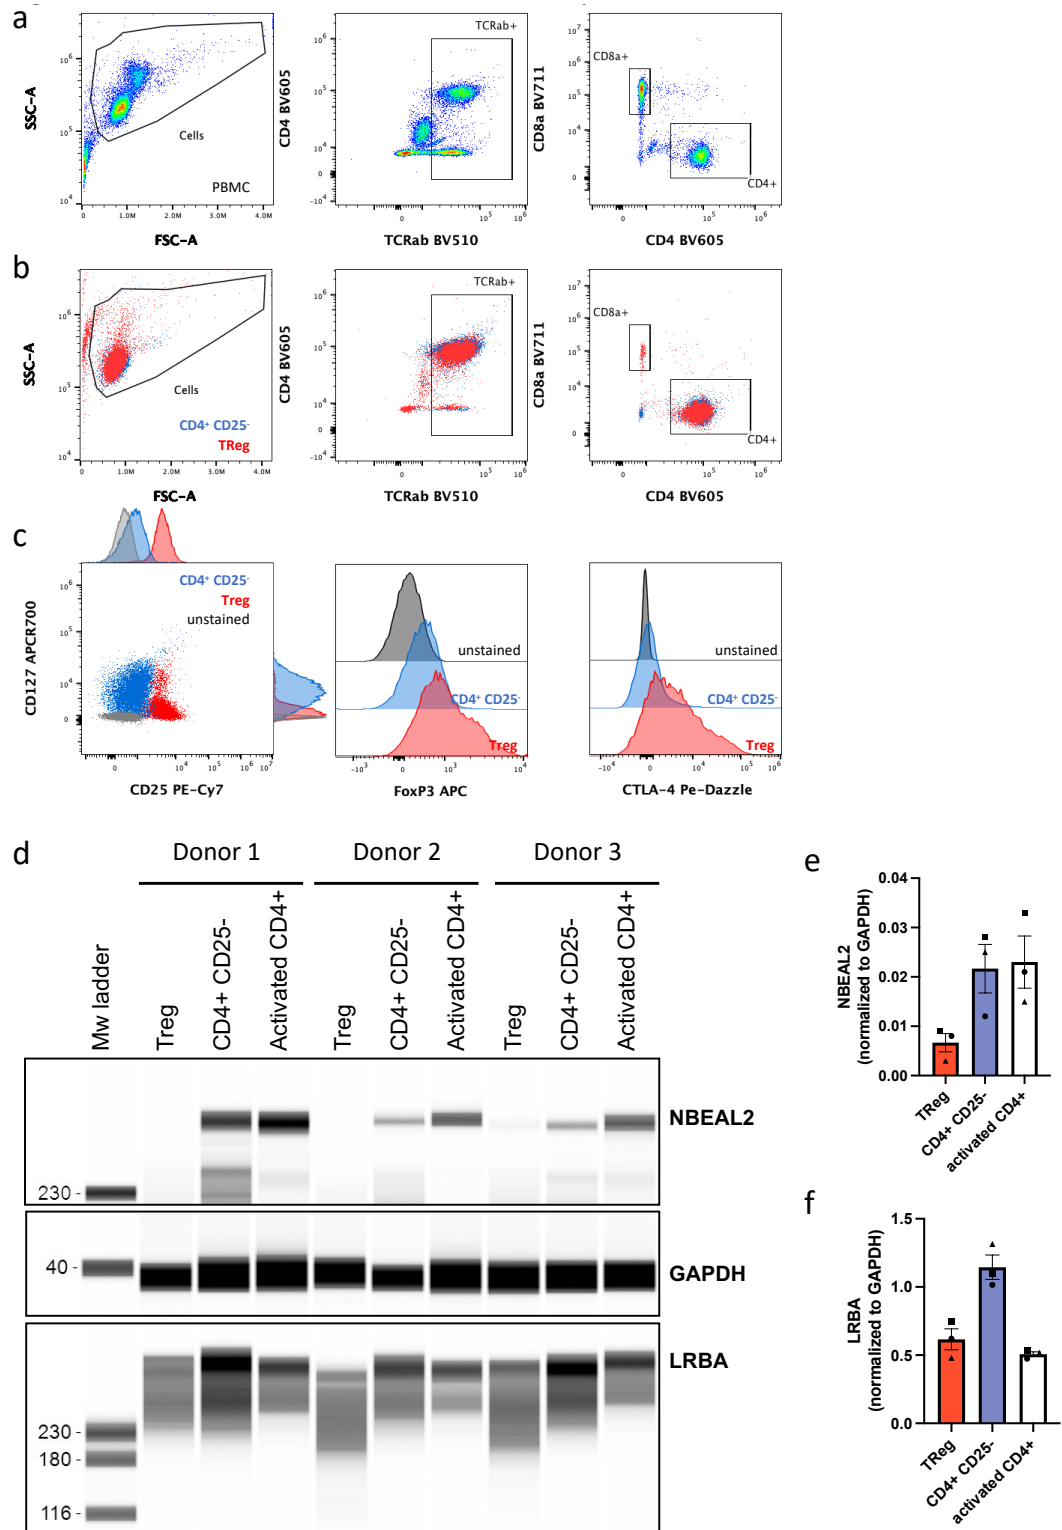

80  
 81 **Supplementary Figure 6: NBEAL2 and LRBA expression in sorted Tregs and conventional**  
 82 **T cells from healthy donors. (a) Example of the gating strategy of initial PBMC from a healthy**

83 donor. **(b)** Gating strategy after sorting of Treg (CD4<sup>+</sup> CD25<sup>+</sup> CD127<sup>low</sup>) in red and CD25<sup>-</sup> CD24<sup>+</sup>  
84 T cells in blue. **(c)** Gating strategy and histograms illustrating the expression of the sorted cells,  
85 respectively Treg (CD4<sup>+</sup> CD25<sup>+</sup> CD127<sup>low</sup>) in red and CD25<sup>-</sup> CD24<sup>+</sup> T cells in blue. **(d)**  
86 Immunoblotting of NBEAL2, LRBA and GAPDH in different cell subtypes lysates from 3 healthy  
87 donors. Cell lysates are from either Treg, or non-activated CD4<sup>+</sup> CD25<sup>-</sup> T cells or CD4<sup>+</sup> T cells  
88 after TCR activation. Source data are provided as a Source Data file. **(e)** NBEAL2 expression  
89 normalized with GAPDH in Treg, non-activated CD4<sup>+</sup> CD25<sup>-</sup> T cells or CD4<sup>+</sup> T cells after TCR  
90 activation for three independent healthy donors. Means +/-SEM are represented. **(f)** LRBA  
91 expression normalized with GAPDH in Treg, non-activated CD4<sup>+</sup> CD25<sup>-</sup> T cells or CD4<sup>+</sup> T cells  
92 after TCR activation for three independent healthy donors. Means +/-SEM are represented.

93



94  
95  
96

**Supplementary Figure 7. Immunoblotting of NBEAL2, LRBA and GAPDH – uncropped blots.**

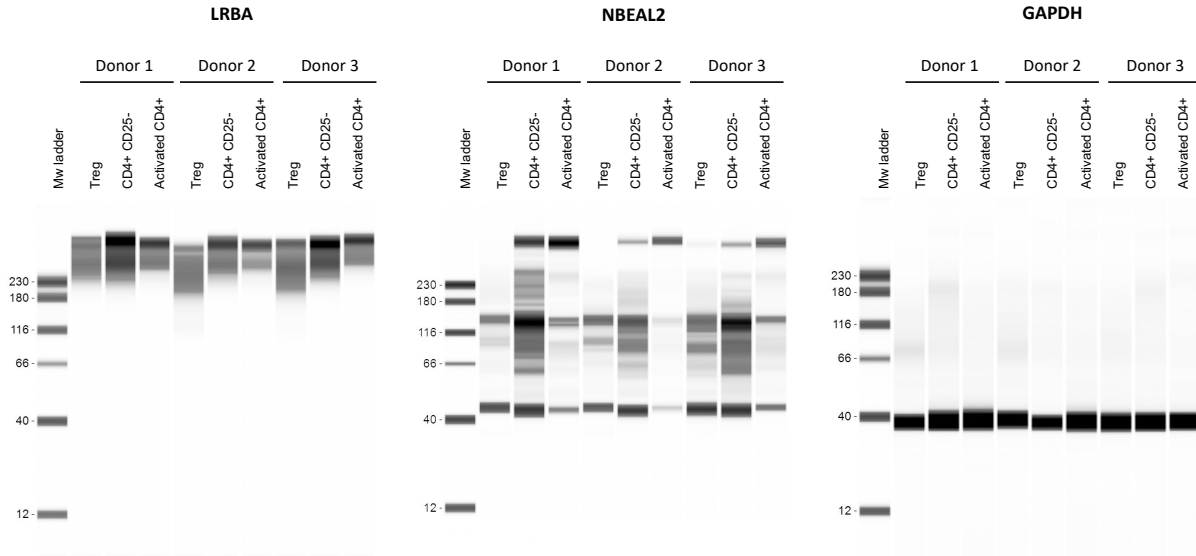

97  
98  
99  
100  
101  
102  
103

**Supplementary Figure 7. Immunoblotting of NBEAL2, LRBA and GAPDH – uncropped blots.** Source data of the immunoblotting of supplementary figure 6d. NBEAL2, LRBA and GAPDH in different cell subtypes lysates from 3 healthy donors. Cell lysates are from either Treg, or non-activated CD4<sup>+</sup> CD25<sup>-</sup> T cells or CD4<sup>+</sup> T cells after TCR activation.

Supplementary Figure 8: Single-cell RNA sequencing of NBEAL2- and LRBA-deficient cells

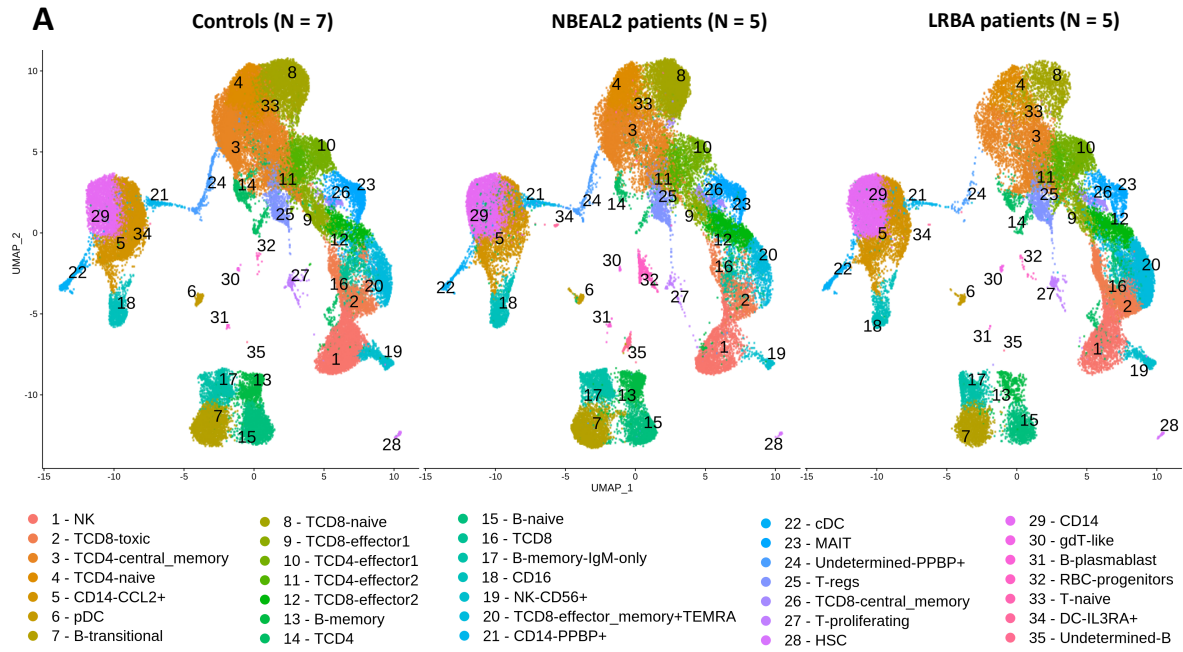

**B** T cells from control samples

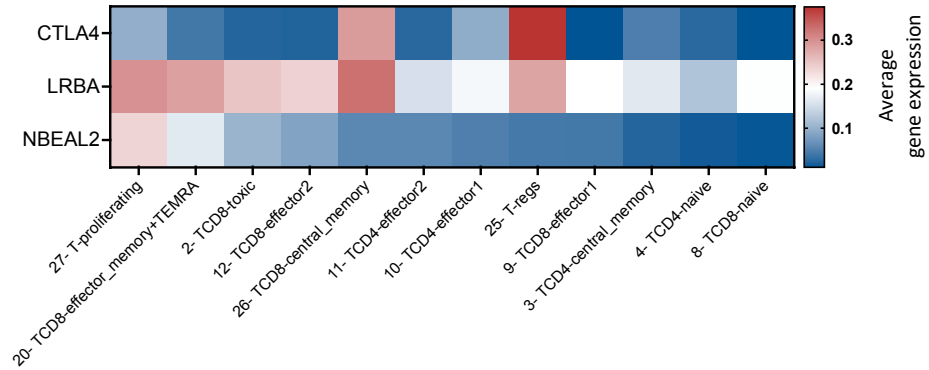

**C**

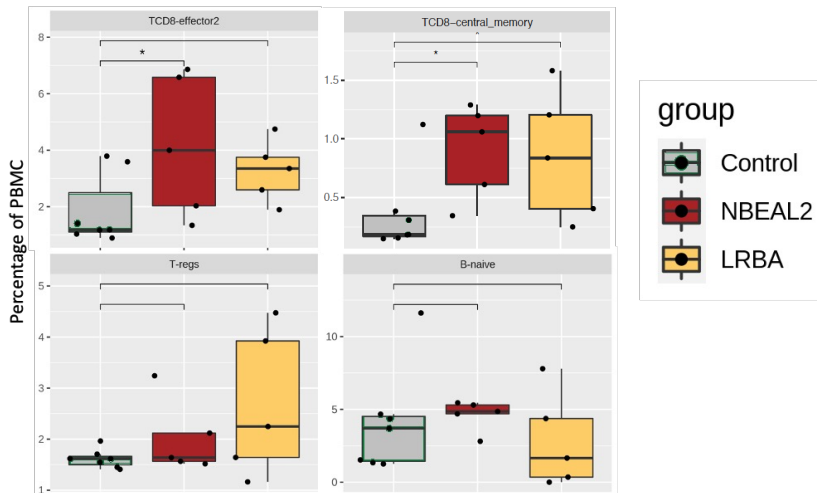

107 **Supplementary Figure 8. Single-cell RNA sequencing of NBEAL2 and LRBA deficient cells.**  
108 **(A)** PBMC from controls, NBEAL2 and LRBA patients were analyzed by single cell RNA  
109 Sequencing (scRNA Seq). UniformManifold Approximation and Projection (UMAP) of 134,776  
110 single cells following extraction from PBMCs (7 Control, 5 NBEAL2, and 5 LRBA) and processed  
111 by scRNA-seq. A resolution of 1.8 allows us to identify 32 clusters based on the expression of  
112 specific markers and gene signatures. The cell subsets are represented and annotated with color  
113 and number (see legend at the bottom). **(B)** Heatmap of the average gene expression of CTLA-  
114 4, LRBA and NBEAL2 in the different T cell subsets of controls samples, after scRNA Seq  
115 analyses. Subsets are ranked from the highest NBEAL2 gene expression to the lowest. **(C)**  
116 Cluster biases observed in the sc RNA Seq experiment (performed once) after clustering in  
117 controls (N=7), NBEAL2 (N=5) and LRBA patients (N=5) PBMC samples. Each dot corresponds  
118 to an independent donor or patient. The line inside the box is the median value (50<sup>th</sup> percentile).  
119 Minima and maxima of the boxes correspond to 25<sup>th</sup> and 75<sup>th</sup> percentile. Whiskers marks the 10<sup>th</sup>  
120 and 90<sup>th</sup> percentile. Two-tailed p-values were determined with a nonparametric Mann-Whitney  
121 test. (\*) p-value < 0.05; (\*\*) p-value < 0.01; (\*\*\*) p-value < 0.005 ; (\*\*\*\*) p-value < 0.0001.

122

123

**Supplementary Figure 9: single-cell RNA sequencing quality control – UMAP per sample**

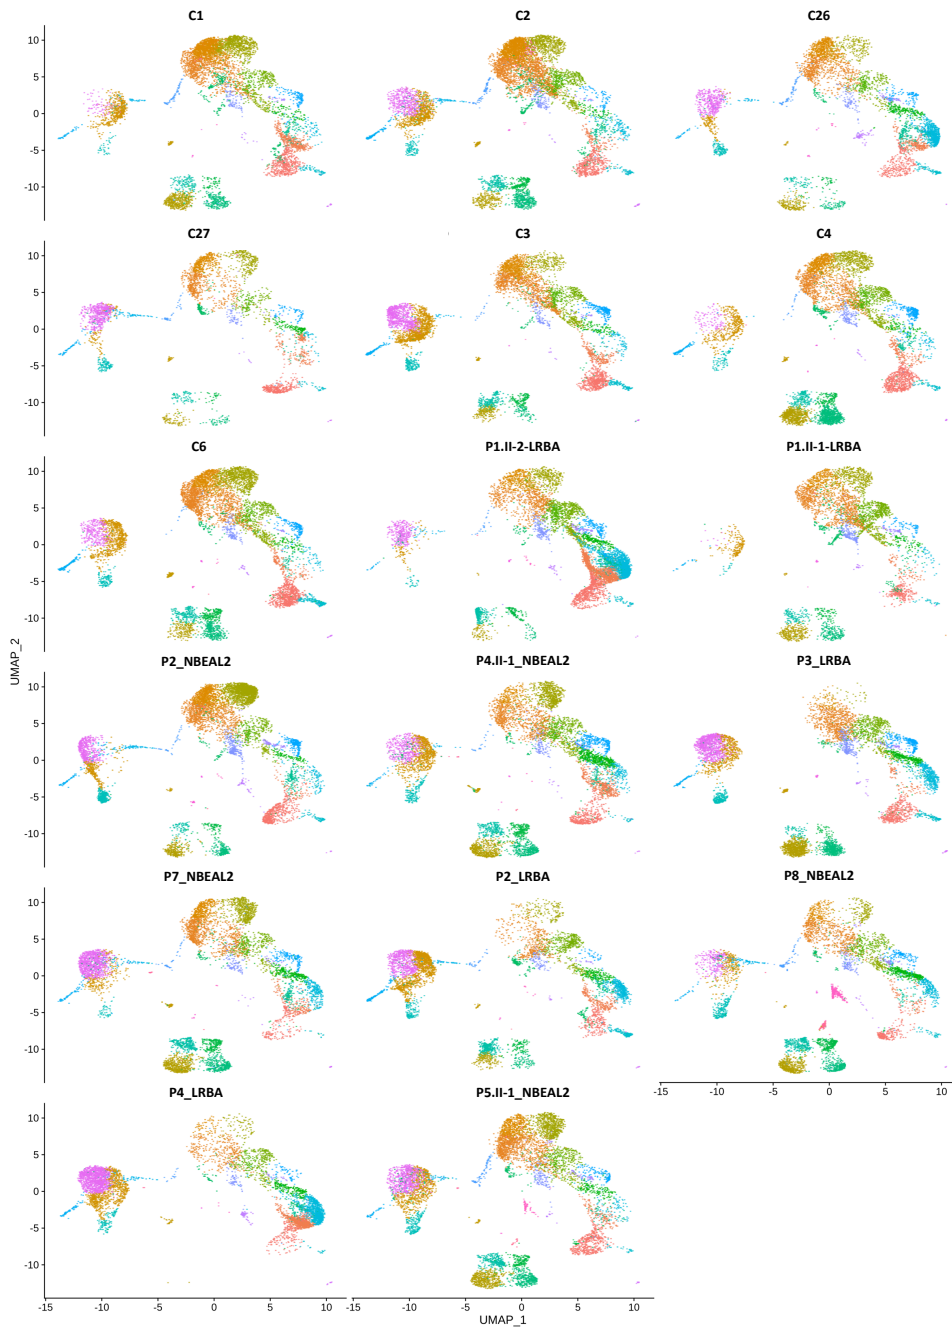

125

126

**Supplementary Figure 9: single-cell RNA sequencing quality control – UMAP per sample.**

127

UMAP for each sample analyzed by single-cell RNA sequencing.

128

**Supplementary Figure 10: sc RNA seq QC – markers used to perform cluster identification**

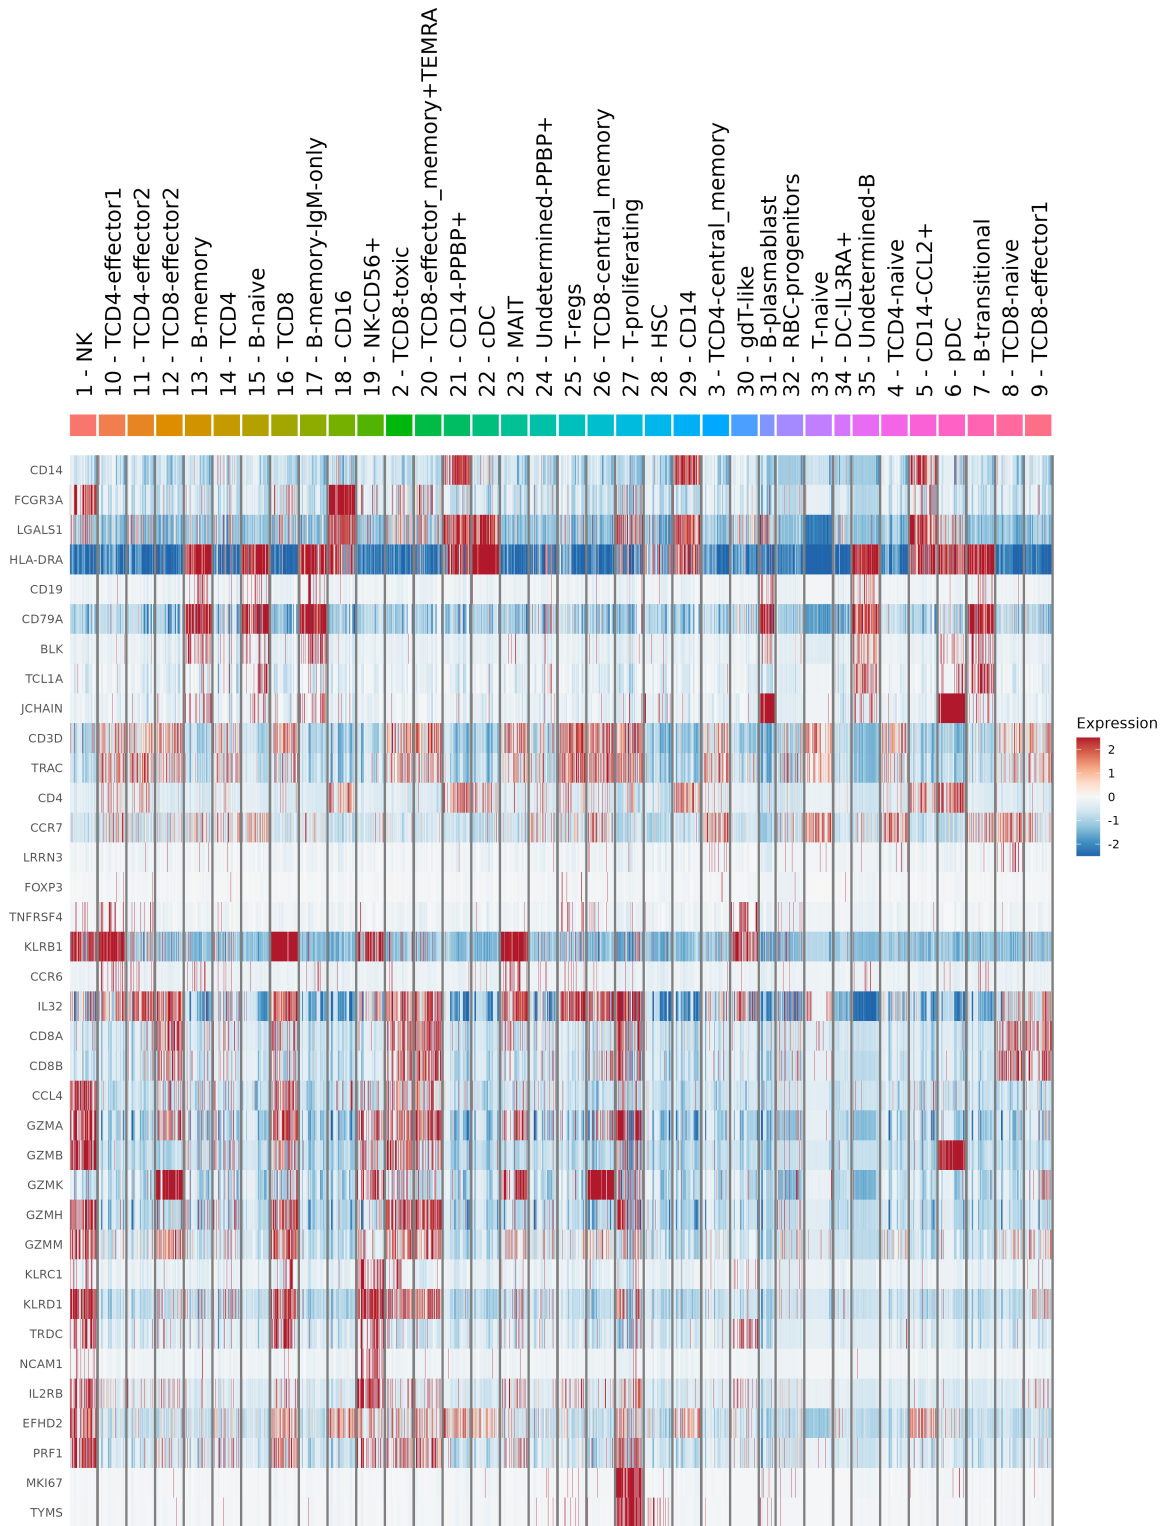

130

**Supplementary Figure 10: sc RNA seq QC – markers used to perform cluster identification.**

131 Heatmap of intensities for each lineage marker used for cluster identification after unsupervised  
 132 clustering for all samples.  
 133

134 **Supplementary Figure 11: single-cell RNA sequencing quality control – percentage of**  
135 **mitochondrial genes per sample.**

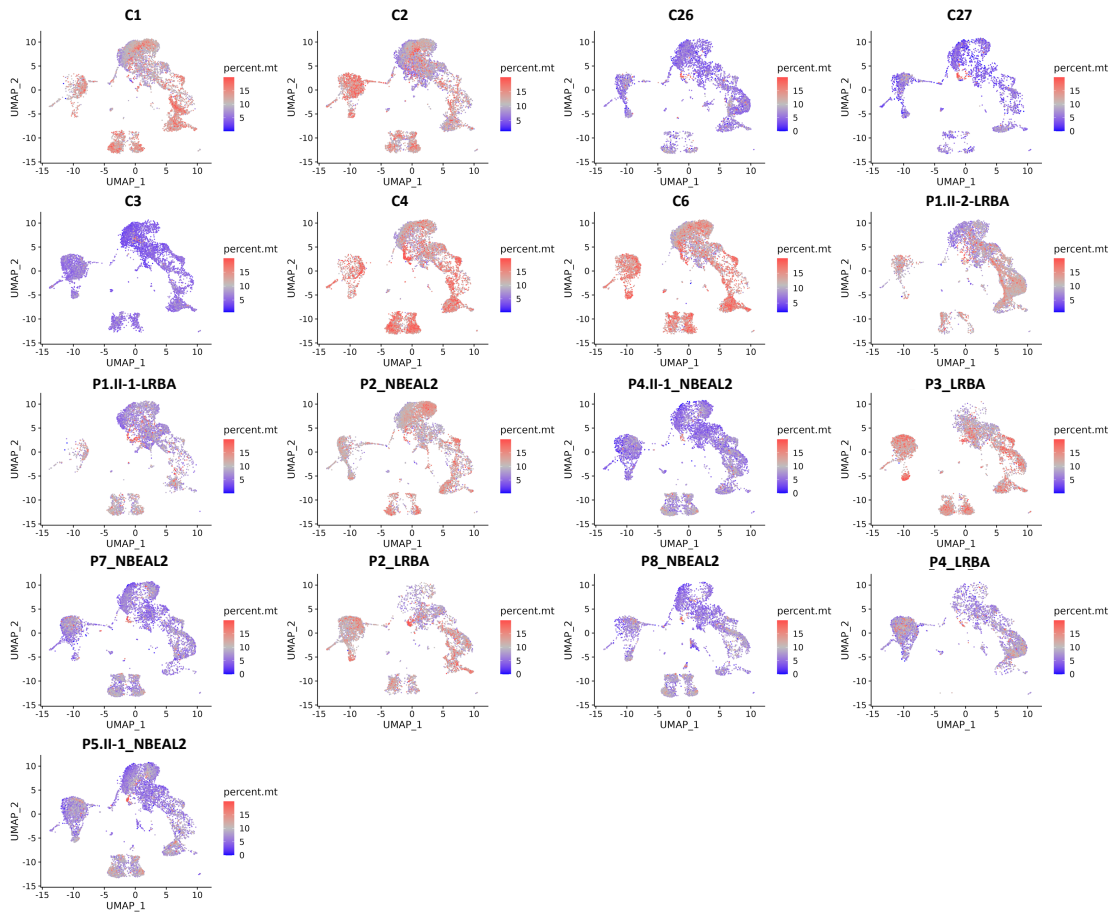

136 **Supplementary Figure 11 – single-cell RNA sequencing quality control – percentage of**  
137 **mitochondrial genes per sample.**  
138  
139

140 **Supplementary Figure 12. IL-6 signaling pathway in LRBA deficient cells compared to**  
 141 **NBEAL2 deficient cells – example of the CD4+ central memory subset.**

IL-6 Signaling

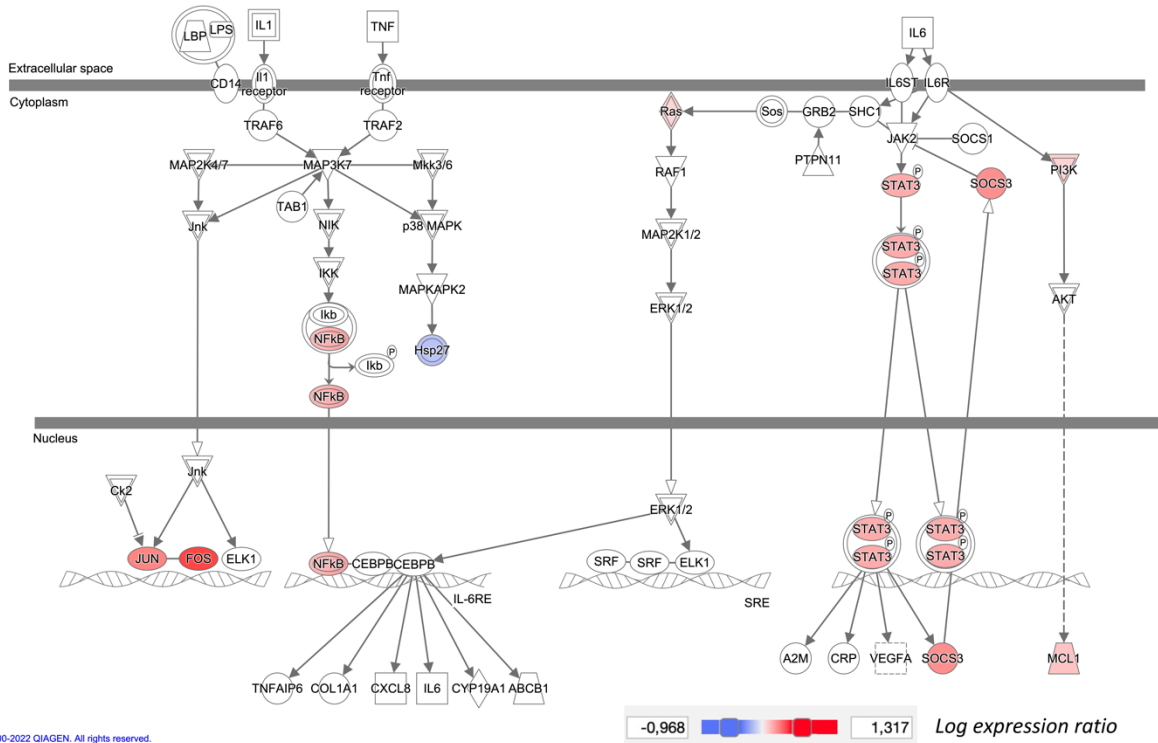

142  
 143 **Supplementary Figure 12. IL-6 signaling pathway in LRBA deficient cells compared to**  
 144 **NBEAL2 deficient cells – example of the CD4+ central memory subset.** Illustration of the  
 145 upregulation of IL-6 signaling pathway in LRBA deficient cells (here for the central memory CD4+  
 146 subset). This upregulation is found in other T cells subsets. The colors on the network correspond  
 147 to the log ratio expression of the implicated genes. The network has been generated using the  
 148 *Ingenuity Pathway Analysis* software.

149  
 150  
 151

12

**Supplementary Table 1. List of detailed variants and publications where patients were already described.**

| Patient number | Affected allele       | Var_ID1           | Mutation 1    | Var_ID2           | Mutation 2   | Var_ID3        | Mutation 3 | PubMed number of previous publications reporting the patient (Patient ID in the publication)                                                                                                                           |
|----------------|-----------------------|-------------------|---------------|-------------------|--------------|----------------|------------|------------------------------------------------------------------------------------------------------------------------------------------------------------------------------------------------------------------------|
| P1             | homozygous            | 3_47044502_C_T    | p.R1839C      | 3_47044502_C_T    | p.R1839C     | NA             | NA         | 21765412 (GPS.5)                                                                                                                                                                                                       |
| P2             | homozygous            | 3_47042783_ATGC_A | p.L1501X      | 3_47042783_ATGC_A | p.L1501X     | NA             | NA         | 26472737 (P6), 33496751 (Patient H)                                                                                                                                                                                    |
| P3             | homozygous            | 3_47037434_A_T    | p.I682F       | 3_47037434_A_T    | p.I682F      | NA             | NA         | Never described.<br>Of note, the same variant was previously described: 21765411 (patient B.II.3) and 32693407 (family 21).<br>However, to our knowledge, the patient described in our manuscript was never described. |
| P4.II-1        | compound heterozygous | 3_47037233_A_T    | p.E643V       | 3_47046466_C_T    | p.P2100L     | NA             | NA         | 21765411 (patient C.II.4b), 32693407 (family 20), 33496751 (Patient B)                                                                                                                                                 |
| P4.II-2        | compound heterozygous | 3_47037233_A_T    | p.E643V       | 3_47046466_C_T    | p.P2100L     | NA             | NA         | 21765411 (Patient C.II.4a), 32693407 (family 20), 31502501                                                                                                                                                             |
| P4.II-3        | compound heterozygous | 3_47037233_A_T    | p.E643V       | 3_47046466_C_T    | p.P2100L     | NA             | NA         | 21765411 (Patient C.II.3), 32693407 (family 20), 33496751 (Patient A)                                                                                                                                                  |
| P5.II-1        | homozygous            | 3_47043514_TG_T   | p.R1631Gfs*3  | 3_47043514_TG_T   | p.R1631Gfs*3 | NA             | NA         | 32693407 (patient P22.1), 33496751 (Patient G)                                                                                                                                                                         |
| P5.II-2        | homozygous            | 3_47043514_TG_T   | p.R1631Gfs*3  | 3_47043514_TG_T   | p.R1631Gfs*3 | NA             | NA         | 32693407 (patient P22.2)                                                                                                                                                                                               |
| P6             | compound heterozygous | 3_47039656_T_C    | p.Y1020H      | 3_47038748_G_A    | c.2650-1G>A  | 3_47047939_G_A | p.E2378E   | 32693407 (patient P31), 33496751 (patient F)                                                                                                                                                                           |
| P7             | compound heterozygous | 3_47047440_C_T    | p.S2269L      | 3_47049615_G_A    | p.G2553E     | 3_47030447_A_G | p.I86V     | 21765411 (patient D.II.3), 32693407 (patient P24), 33496751 (Patient C)                                                                                                                                                |
| P8             | compound heterozygous | 3_47046986_CT_C   | p.C2190Xfs*23 | 3_47050068_T_C    | p.L2646P     | NA             | NA         | 32693407 (patient P25), 33496751 (patient E)                                                                                                                                                                           |
| P9.II-1        | homozygous            | 3_47049139_GAC_G  | p.T2487fs*16  | 3_47049139_GAC_G  | p.T2487X     | p.T2487fs*16   | NA         | Never described                                                                                                                                                                                                        |
| P9.II-2        | homozygous            | 3_47049139_GAC_G  | p.T2487fs*16  | 3_47049139_GAC_G  | p.T2487X     | p.T2487fs*16   | NA         | Never described                                                                                                                                                                                                        |

13

14

15



**Supplementary Table 2. Comparison between our mass spectrometry data and the data from Mayer et al., *Blood*, 2018 and Lo et al., *Blood*, 2020.** In blue, proteins found by Mayer et al., *Blood*, 2018 and in our interactome. In orange, SEC22B, the protein described to interact with NBEAL2 by Lo et al., *Blood*, 2020.

| Data from Mayer et al., <i>Blood</i> , 2018 and Lo et al., <i>Blood</i> , 2020 |            |                                                                   |                                        |                                     | Our data         |                  |                               |                               |                           |
|--------------------------------------------------------------------------------|------------|-------------------------------------------------------------------|----------------------------------------|-------------------------------------|------------------|------------------|-------------------------------|-------------------------------|---------------------------|
| Gene name                                                                      | Uniprot AC | Description                                                       | Validation (Reverse IP) by Mayer et al | Protein Class                       | Ratio ctrls / P6 | Ratio ctrls / P7 | corrected ratio mean ctrls/P6 | corrected ratio mean ctrls/P7 | mean intensities controls |
| NBEAL2                                                                         | H7C3Y7     | Neurobeachin-like protein 2 (Fragment)                            | NA (Bait)                              | phospholipid binding                | 665,43           | 19,97            | 665,43                        | 19,97                         | <b>1,24E+11</b>           |
| HSPB1                                                                          | C9J3N8     | Heat shock protein beta-1                                         | not tested                             | enzymes/enzyme modulators           | #DIV/0!          | 1,33             | 96,05                         | 1,33                          | <b>1,12E+07</b>           |
| TUBB4A                                                                         | P04350     | Tubulin beta-4A chain                                             | not tested                             | cytoskeletal proteins               | 66,36            | 0,78             | 66,36                         | 0,78                          | <b>3,87E+08</b>           |
| VAC14                                                                          | Q08AM6     | Protein VAC14 homolog                                             | Interaction confirmed                  | receptor activity/receptor activity | #DIV/0!          | 1,58             | 18,65                         | 1,58                          | <b>2,18E+06</b>           |
| STAU1                                                                          | Q5JW30     | Double-stranded RNA-binding protein Staufen homolog 1             | not tested                             | enzymes/enzyme modulators           | #DIV/0!          | 2,49             | 12,47                         | 2,49                          | <b>1,46E+06</b>           |
| RPS8                                                                           | Q5JR95     | 40S ribosomal protein S8                                          | not tested                             | nucleic acid binding                | 9,28             | 1,50             | 9,28                          | 1,50                          | <b>9,70E+06</b>           |
| SEC16A                                                                         | J3KNL6     | Protein transport protein Sec16A                                  | Interaction confirmed                  | protein binding                     | #DIV/0!          | #DIV/0!          | 8,09                          | 8,09                          | <b>9,46E+05</b>           |
| GIGYF2                                                                         | C9JW88     | ERQ amino acid-rich with GYF domain-containing protein 2 (Fragmen | not tested                             | nucleic acid binding                | 7,62             | 1,28             | 7,62                          | 1,28                          | <b>9,74E+06</b>           |
| BAG2                                                                           | O95816     | BAG family molecular chaperone regulator 2                        | not tested                             | chaperones/heat shock prtoteins     | 7,15             | #DIV/0!          | 7,15                          | 45,10                         | <b>5,28E+06</b>           |
| YTHDF2                                                                         | Q9Y5A9     | YTH domain family protein 2                                       | not tested                             | nucleic acid binding                | 5,41             | 0,80             | 5,41                          | 0,80                          | <b>4,98E+06</b>           |
| FAM120A                                                                        | H7C0T0     | Constitutive coactivator of PPAR-gamma-like protein 1 (Fragment)  | not tested                             | nucleic acid binding                | 5,26             | 12,97            | 5,26                          | 12,97                         | <b>9,27E+06</b>           |
| LARP1                                                                          | E5RH50     | La-related protein 1 (Fragment)                                   | not tested                             | protein translation                 | 5,18             | 2,69             | 5,18                          | 2,69                          | <b>1,45E+07</b>           |
| EIF4G1                                                                         | G5E9S1     | Eukaryotic translation initiation factor 4 gamma 1                | not tested                             | protein translation                 | 4,82             | 2,55             | 4,82                          | 2,55                          | <b>2,41E+07</b>           |
| OGT                                                                            | O15294     | cetylglucosamine--peptide N-acetylglucosaminyltransferase 110 kDa | not tested                             | enzymes/enzyme modulators           | 4,80             | 1,08             | 4,80                          | 1,08                          | <b>6,02E+06</b>           |
| POLR2B                                                                         | C9J4M6     | DNA-directed RNA polymerase                                       | not tested                             | enzymes/enzyme modulators           | 4,70             | 3,35             | 4,70                          | 3,35                          | <b>1,47E+07</b>           |
| ATXN2L                                                                         | Q8WWM7-6   | Isoform 6 of Ataxin-2-like protein                                | not tested                             | nucleic acid binding                | 4,43             | 4,99             | 4,43                          | 4,99                          | <b>3,68E+06</b>           |
| UPF1                                                                           | Q92900-2   | Isoform 2 of Regulator of nonsense transcripts 1                  | not tested                             | nucleic acid binding                | 4,37             | 3,35             | 4,37                          | 3,35                          | <b>6,44E+07</b>           |
| DDX17                                                                          | G5E9L5     | DEAD (Asp-Glu-Ala-Asp) box polypeptide 17, isoform CRA_a          | not tested                             | transcription factors/cofactors     | 3,70             | 0,44             | 3,70                          | 0,44                          | <b>2,41E+08</b>           |
| RPL24                                                                          | C9JXB8     | 60S ribosomal protein L24                                         | not tested                             | nucleic acid binding                | 3,67             | 1,52             | 3,67                          | 1,52                          | <b>7,92E+07</b>           |
| NONO                                                                           | Q15233     | Non-POU domain-containing octamer-binding protein                 | not tested                             | transcription factors/cofactors     | 3,58             | 1,06             | 3,58                          | 1,06                          | <b>5,85E+07</b>           |
| ZC3HAV1                                                                        | Q7Z2W4-2   | Isoform 2 of Zinc finger CCCH-type antiviral protein 1            | not tested                             | enzymes/enzyme modulators           | 3,47             | 1,49             | 3,47                          | 1,49                          | <b>6,07E+07</b>           |
| TUBG1                                                                          | K7EKE5     | Tubulin gamma-1 chain                                             | not tested                             | cytoskeletal proteins               | 3,45             | 1,65             | 3,45                          | 1,65                          | <b>2,42E+07</b>           |
| DNAJA1                                                                         | P31689     | DnaJ homolog subfamily A member 1                                 | not tested                             | chaperones/heat shock prtoteins     | 3,33             | 1,62             | 3,33                          | 1,62                          | <b>4,40E+07</b>           |
| SLTM                                                                           | H0YKH2     | SAFB-like transcription modulator (Fragment)                      | not tested                             | nucleic acid binding                | 3,27             | 1,46             | 3,27                          | 1,46                          | <b>2,09E+06</b>           |
| CRLF3                                                                          | Q8IUI8-2   | Isoform 2 of Cytokine receptor-like factor 3                      | not tested                             | protein dimerization                | 3,22             | 0,90             | 3,22                          | 0,90                          | <b>1,91E+07</b>           |

|           |          |                                                                      |                            |                                     |      |      |      |      |                 |
|-----------|----------|----------------------------------------------------------------------|----------------------------|-------------------------------------|------|------|------|------|-----------------|
| SORD      | H0YLA4   | Sorbitol dehydrogenase                                               | not tested                 | enzymes/enzyme modulators           | 3,06 | 1,25 | 3,06 | 1,25 | <b>9,50E+06</b> |
| BAG6      | B0UX83   | HLA-B associated transcript 3                                        | not tested                 | chaperones/heat shock prtoteins     | 2,95 | 4,22 | 2,95 | 4,22 | <b>2,25E+07</b> |
| HUWE1     | H0Y5W0   | E3 ubiquitin-protein ligase HUWE1 (Fragment)                         | not tested                 | enzymes/enzyme modulators           | 2,87 | 1,07 | 2,87 | 1,07 | <b>3,73E+07</b> |
| C14orf166 | H0YJB9   | UPF0568 protein C14orf166 (Fragment)                                 | not tested                 | protein dimerization                | 2,80 | 1,35 | 2,80 | 1,35 | <b>1,14E+07</b> |
| SHMT1     | B4DPM9   | Serine hydroxymethyltransferase                                      | not tested                 | enzymes/enzyme modulators           | 2,80 | 1,23 | 2,80 | 1,23 | <b>1,17E+07</b> |
| PABPC4    | Q13310-2 | Isoform 2 of Polyadenylate-binding protein 4                         | not tested                 | nucleic acid binding                | 2,68 | 0,92 | 2,68 | 0,92 | <b>3,79E+06</b> |
| LARP4B    | H0Y4V9   | La-related protein 4B (Fragment)                                     | not tested                 | nucleic acid binding                | 2,67 | 1,62 | 2,67 | 1,62 | <b>2,49E+06</b> |
| DNAJA2    | O60884   | DnaJ homolog subfamily A member 2                                    | not tested                 | chaperones/heat shock prtoteins     | 2,52 | 0,96 | 2,52 | 0,96 | <b>4,03E+06</b> |
| UBAP2L    | H0Y5H6   | Ubiquitin-associated protein 2-like (Fragment)                       | not tested                 | nucleic acid binding                | 2,49 | 3,13 | 2,49 | 3,13 | <b>2,21E+06</b> |
| APOL2     | Q9BQE5   | Apolipoprotein L2                                                    | not tested                 | receptor activity/receptor activity | 2,44 | 1,17 | 2,44 | 1,17 | <b>1,53E+07</b> |
| SEC22B    | O75396   | Vesicle-trafficking protein SEC22b                                   | Interaction confirmed      | protein binding                     | 2,43 | 1,61 | 2,43 | 1,61 | <b>3,71E+07</b> |
| AIP       | O00170   | AH receptor-interacting protein                                      | not tested                 | chaperones/heat shock prtoteins     | 2,41 | 2,18 | 2,41 | 2,18 | <b>1,17E+08</b> |
| AGO2      | Q9UKV8   | Protein argonaute-2                                                  | not tested                 | protein translation                 | 2,38 | 1,83 | 2,38 | 1,83 | <b>6,36E+06</b> |
| CCT8      | G5E9B2   | Chaperonin containing TCP1, subunit 8 (Theta), isoform CRA_a         | not tested                 | chaperones/heat shock prtoteins     | 2,37 | 1,11 | 2,37 | 1,11 | <b>6,88E+08</b> |
| RFC5      | P40937   | Replication factor C subunit 5                                       | not tested                 | enzymes/enzyme modulators           | 2,22 | 1,51 | 2,22 | 1,51 | <b>2,89E+07</b> |
| CAPRIN1   | E9PLA9   | Caprin-1 (Fragment)                                                  | not tested                 | nucleic acid binding                | 2,20 | 1,26 | 2,20 | 1,26 | <b>1,91E+07</b> |
| DNAJC7    | K7ELJ8   | DnaJ homolog subfamily C member 7                                    | not tested                 | chaperones/heat shock prtoteins     | 2,11 | 1,00 | 2,11 | 1,00 | <b>1,24E+07</b> |
| PSMC2     | B7Z5E2   | 26S protease regulatory subunit 7                                    | not tested                 | enzymes/enzyme modulators           | 2,06 | 0,89 | 2,06 | 0,89 | <b>8,34E+07</b> |
| HNRNPA0   | Q13151   | Heterogeneous nuclear ribonucleoprotein A0                           | not tested                 | enzymes/enzyme modulators           | 2,05 | 1,36 | 2,05 | 1,36 | <b>2,52E+07</b> |
| RANGAP1   | B0QYT6   | Ran GTPase activating protein 1 (Fragment)                           | not tested                 | enzymes/enzyme modulators           | 1,98 | 1,14 | 1,98 | 1,14 | <b>1,67E+07</b> |
| RUVBL2    | Q9Y230   | RuvB-like 2                                                          | not tested                 | chaperones/heat shock prtoteins     | 1,94 | 1,27 | 1,94 | 1,27 | <b>2,61E+08</b> |
| NTPCR     | Q9BSD7   | Cancer-related nucleoside-triphosphatase                             | not tested                 | enzymes/enzyme modulators           | 1,91 | 1,36 | 1,91 | 1,36 | <b>1,30E+07</b> |
| HSPA1B    | F8VZJ4   | Heat shock 70 kDa protein 1A/1B                                      | Interaction not replicated | chaperones/heat shock prtoteins     | 1,91 | 1,10 | 1,91 | 1,10 | <b>2,95E+08</b> |
| PABPC1    | P11940   | Polyadenylate-binding protein 1                                      | not tested                 | protein translation                 | 1,87 | 1,03 | 1,87 | 1,03 | <b>1,08E+08</b> |
| SERBP1    | Q8NC51-4 | Isoform 4 of Plasminogen activator inhibitor 1 RNA-binding protein   | not tested                 | nucleic acid binding                | 1,79 | 1,07 | 1,79 | 1,07 | <b>8,10E+07</b> |
| RPS13     | E9PS50   | 40S ribosomal protein S13 (Fragment)                                 | not tested                 | nucleic acid binding                | 1,76 | 0,77 | 1,76 | 0,77 | <b>5,83E+07</b> |
| RUVBL1    | E7ETR0   | RuvB-like 1                                                          | not tested                 | enzymes/enzyme modulators           | 1,76 | 1,55 | 1,76 | 1,55 | <b>1,72E+08</b> |
| HNRNPAB   | D6R9P3   | Heterogeneous nuclear ribonucleoprotein A/B                          | not tested                 | transcription factors/cofactors     | 1,75 | 0,98 | 1,75 | 0,98 | <b>6,47E+07</b> |
| FARSA     | B4E363   | Phenylalanine--tRNA ligase alpha subunit                             | not tested                 | enzymes/enzyme modulators           | 1,74 | 1,01 | 1,74 | 1,01 | <b>2,31E+08</b> |
| NUDT21    | H3BV41   | Cleavage and polyadenylation-specificity factor subunit 5 (Fragment) | not tested                 | enzymes/enzyme modulators           | 1,69 | 1,68 | 1,69 | 1,68 | <b>2,41E+07</b> |
| TUBB      | F8VW92   | Tubulin beta chain                                                   | Interaction not replicated | cytoskeletal proteins               | 1,68 | 1,06 | 1,68 | 1,06 | <b>6,25E+09</b> |

|         |           |                                                                    |                            |                                     |      |         |      |      |                 |
|---------|-----------|--------------------------------------------------------------------|----------------------------|-------------------------------------|------|---------|------|------|-----------------|
| RTCB    | Q9Y310    | tRNA-splicing ligase RtcB homolog                                  | not tested                 | nucleic acid binding                | 1,67 | 1,00    | 1,67 | 1,00 | <b>8,03E+07</b> |
| RPL10A  | P62906    | 60S ribosomal protein L10a                                         | not tested                 | nucleic acid binding                | 1,66 | 0,80    | 1,66 | 0,80 | <b>8,26E+07</b> |
| POLR2E  | P19388    | DNA-directed RNA polymerases I, II, and III subunit RPABC1         | not tested                 | enzymes/enzyme modulators           | 1,66 | 1,00    | 1,66 | 1,00 | <b>5,54E+06</b> |
| MTHFD1  | G3V3L6    | C-1-tetrahydrofolate synthase, cytoplasmic                         | not tested                 | enzymes/enzyme modulators           | 1,63 | 0,99    | 1,63 | 0,99 | <b>1,33E+09</b> |
| TARDBP  | B4DJ45    | TAR DNA-binding protein 43                                         | not tested                 | transcription factors/cofactors     | 1,63 | 1,25    | 1,63 | 1,25 | <b>5,83E+07</b> |
| TUBB2A  | Q13885    | Tubulin beta-2A chain                                              | not tested                 | cytoskeletal proteins               | 1,53 | 0,49    | 1,53 | 0,49 | <b>1,12E+07</b> |
| TUBB4B  | P68371    | Tubulin beta-4B chain                                              | Interaction not replicated | cytoskeletal proteins               | 1,53 | 1,02    | 1,53 | 1,02 | <b>2,23E+10</b> |
| GPN1    | B5MBZ5    | GPN-loop GTPase 1                                                  | not tested                 | enzymes/enzyme modulators           | 1,50 | 1,30    | 1,50 | 1,30 | <b>3,12E+06</b> |
| HNRNPD  | D6RF44    | Heterogeneous nuclear ribonucleoprotein D0 (Fragment)              | not tested                 | transcription factors/cofactors     | 1,35 | 1,00    | 1,35 | 1,00 | <b>3,14E+08</b> |
| CCAR2   | G3V119    | DBIRD complex subunit KIAA1967                                     | not tested                 | enzymes/enzyme modulators           | 1,28 | 1,12    | 1,28 | 1,12 | <b>1,70E+08</b> |
| UBC     | F5H265    | Polyubiquitin-C (Fragment)                                         | Interaction not replicated | enzymes/enzyme modulators           | 1,26 | 1,07    | 1,26 | 1,07 | <b>1,25E+09</b> |
| ILF3    | G5E9M5    | Interleukin enhancer binding factor 3, 90kDa, isoform CRA_b        | not tested                 | nucleic acid binding                | 1,23 | 0,70    | 1,23 | 0,70 | <b>3,19E+07</b> |
| HNRNPA3 | P51991    | Heterogeneous nuclear ribonucleoprotein A3                         | not tested                 | nucleic acid binding                | 1,23 | 1,11    | 1,23 | 1,11 | <b>1,61E+08</b> |
| POLR1C  | O15160-2  | Isoform 2 of DNA-directed RNA polymerases I and III subunit RPAC1  | not tested                 | enzymes/enzyme modulators           | 1,17 | 1,04    | 1,17 | 1,04 | <b>8,52E+06</b> |
| ALYREF  | Q86V81    | THO complex subunit 4                                              | not tested                 | nucleic acid binding                | 1,12 | 0,77    | 1,12 | 0,77 | <b>1,49E+08</b> |
| PABPN1  | Q86U42-2  | Isoform 2 of Polyadenylate-binding protein 2                       | not tested                 | nucleic acid binding                | 1,03 | 0,98    | 1,03 | 0,98 | <b>2,13E+07</b> |
| RALY    | Q5QPRMN0A | ein, autoantigenic (HnRNP-associated with lethal yellow homolog (M | not tested                 | nucleic acid binding                | 1,02 | 1,97    | 1,02 | 1,97 | <b>1,82E+07</b> |
| HNRNPR  | Q2L7G6    | Heterogeneous nuclear ribonucleoprotein R                          | not tested                 | nucleic acid binding                | 1,02 | 0,73    | 1,02 | 0,73 | <b>2,39E+07</b> |
| LARP4   | G5E976    | La ribonucleoprotein domain family, member 4, isoform CRA_h        | not tested                 | nucleic acid binding                | 0,95 | 0,56    | 0,95 | 0,56 | <b>3,79E+05</b> |
| CPSF4   | O95639    | Cleavage and polyadenylation specificity factor subunit 4          | not tested                 | nucleic acid binding                | 0,91 | 0,54    | 0,91 | 0,54 | <b>5,95E+05</b> |
| RBBP7   | E9PC52    | Histone-binding protein RBBP7                                      | not tested                 | nucleic acid binding                | 0,86 | 0,94    | 0,86 | 0,94 | <b>2,32E+07</b> |
| RBMX    | H0Y6E7    | binding motif protein, X chromosome, N-terminally processed (Frag  | not tested                 | nucleic acid binding                | 0,77 | 1,19    | 0,77 | 1,19 | <b>6,20E+06</b> |
| CPSF1   | Q10570    | Cleavage and polyadenylation specificity factor subunit 1          | not tested                 | enzymes/enzyme modulators           | 0,50 | #DIV/0! | 0,50 | 7,12 | <b>8,33E+05</b> |
| TUBB6   | Q9BUF5    | Tubulin beta-6 chain                                               | not tested                 | cytoskeletal proteins               | 0,03 | 0,25    | 0,03 | 0,25 | <b>4,20E+05</b> |
| AKAP8   | O43823    | A-kinase anchor protein 8                                          | not tested                 | enzymes/enzyme modulators           | NA   | NA      | NA   | NA   | NA              |
| AKAP8L  | Q9ULX6-2  | Isoform 2 of A-kinase anchor protein 8-like                        | not tested                 | enzymes/enzyme modulators           | NA   | NA      | NA   | NA   | NA              |
| ALDH7A1 | P49419-2  | Isoform 2 of Alpha-aminoadipic semialdehyde dehydrogenase          | not tested                 | enzymes/enzyme modulators           | NA   | NA      | NA   | NA   | NA              |
| AMOT    | Q4VCS5-2  | Isoform 2 of Angiomotin                                            | not tested                 | receptor activity/receptor activity | NA   | NA      | NA   | NA   | NA              |
| ATXN2   | H0YH87    | Ataxin-2 (Fragment)                                                | Interaction not replicated | receptor activity/receptor activity | NA   | NA      | NA   | NA   | NA              |
| BAG4    | O95429-2  | Isoform 2 of BAG family molecular chaperone regulator 4            | not tested                 | chaperones/heat shock prtoteins     | NA   | NA      | NA   | NA   | NA              |

|             |          |                                                                                       |                            |                                 |    |    |    |    |    |
|-------------|----------|---------------------------------------------------------------------------------------|----------------------------|---------------------------------|----|----|----|----|----|
| CAMKC2aA1c1 | D6RHX9   | m/calmodulin-dependent protein kinase type II subunit alpha (Fragmen217)              | not tested                 | enzymes/enzyme modulators       | NA | NA | NA | NA | NA |
| CDC42EP1    | Q00587-2 | Isoform 2 of Cdc42 effector protein 1                                                 | not tested                 | enzymes/enzyme modulators       | NA | NA | NA | NA | NA |
| CHERP       | Q8IWX8   | Calcium homeostasis endoplasmic reticulum protein                                     | not tested                 | ion channel binding             | NA | NA | NA | NA | NA |
| CPEB4       | H0YBG1   | Cytoplasmic polyadenylation element-binding protein 4 (Fragment)                      | not tested                 | protein translation             | NA | NA | NA | NA | NA |
| CPSF7       | J3QT54   | Cleavage and polyadenylation-specificity factor subunit 7 (Fragment)                  | not tested                 | nucleic acid binding            | NA | NA | NA | NA | NA |
| DNAJB6      | C9JB42   | DnaJ homolog subfamily B member 6 (Fragment)                                          | not tested                 | chaperones/heat shock proteins  | NA | NA | NA | NA | NA |
| DOCK7       | H0Y7L2   | Dedicator of cytokinesis protein 7 (Fragment)                                         | Interaction confirmed      | enzymes/enzyme modulators       | NA | NA | NA | NA | NA |
| EIF4G3      | B1AN89   | Eukaryotic translation initiation factor 4 gamma 3                                    | not tested                 | protein translation             | NA | NA | NA | NA | NA |
| ELAVL2      | B1AM48   | (Embryonic lethal, abnormal vision, Drosophila)-like 2 (Hu antigen B) (Fragm82e.n7t0) | not tested                 | nucleic acid binding            | NA | NA | NA | NA | NA |
| FIP1L1      | G3XAD6   | FIP1 like 1 (S. cerevisiae), isoform CRA_d                                            | not tested                 | nucleic acid binding            | NA | NA | NA | NA | NA |
| FMR1        | A8MQB8   | Fragile X mental retardation protein 1                                                | not tested                 | protein dimerization            | NA | NA | NA | NA | NA |
| FXR2        | I3L1Z2   | Fragile X mental retardation syndrome-related protein 2 (Fragment)                    | not tested                 | protein dimerization            | NA | NA | NA | NA | NA |
| GTF3C5      | Q5T7U1   | General transcription factor 3C polypeptide 5                                         | not tested                 | nucleic acid binding            | NA | NA | NA | NA | NA |
| HAX1        | E9PIQ7   | HCLS1-associated protein X-1                                                          | not tested                 | interleukin-1 binding           | NA | NA | NA | NA | NA |
| HELZ        | J3QS41   | Probable helicase with zinc finger domain                                             | not tested                 | enzymes/enzyme modulators       | NA | NA | NA | NA | NA |
| IGF2BP2     | F8W930   | Insulin-like growth factor 2 mRNA-binding protein 2                                   | not tested                 | protein translation             | NA | NA | NA | NA | NA |
| IGF2BP3     | F8WD15   | Insulin-like growth factor 2 mRNA-binding protein 3                                   | not tested                 | protein translation             | NA | NA | NA | NA | NA |
| LSM12       | K7ELG9   | Protein LSM12 homolog                                                                 | not tested                 | unclassified                    | NA | NA | NA | NA | NA |
| MOV10       | Q5JR04   | Mov10, Moloney leukemia virus 10, homolog (Mouse)                                     | not tested                 | nucleic acid binding            | NA | NA | NA | NA | NA |
| NCOA1       | B5MCN7   | Nuclear receptor coactivator 1                                                        | not tested                 | enzymes/enzyme modulators       | NA | NA | NA | NA | NA |
| NCOR1       | O75376-2 | Isoform 2 of Nuclear receptor corepressor 1                                           | not tested                 | transcription factors/cofactors | NA | NA | NA | NA | NA |
| NUFIP2      | Q7Z417   | Nuclear fragile X mental retardation-interacting protein 2                            | Interaction not replicated | nucleic acid binding            | NA | NA | NA | NA | NA |
| PIKFYVE     | E9PDH4   | 1-phosphatidylinositol 3-phosphate 5-kinase (Fragment)                                | not tested                 | enzymes/enzyme modulators       | NA | NA | NA | NA | NA |
| PRRC2A      | C9J1F6   | Protein PRRC2A                                                                        | not tested                 | nucleic acid binding            | NA | NA | NA | NA | NA |
| PUM1        | E9PR38   | Pumilio homolog 1                                                                     | not tested                 | nucleic acid binding            | NA | NA | NA | NA | NA |
| QKI         | F5GYT7   | Protein quaking                                                                       | not tested                 | nucleic acid binding            | NA | NA | NA | NA | NA |
| RANBP2      | F8WBP7   | Putative peptidyl-prolyl cis-trans isomerase                                          | not tested                 | enzymes/enzyme modulators       | NA | NA | NA | NA | NA |
| RBM14       | Q96PK6   | RNA-binding protein 14                                                                | not tested                 | transcription factors/cofactors | NA | NA | NA | NA | NA |
| RBM7        | G3V1T9   | RNA binding motif protein 7, isoform CRA_a                                            | not tested                 | nucleic acid binding            | NA | NA | NA | NA | NA |
| RBMS1       | E7EPF2   | RNA-binding motif, single-stranded-interacting protein 1 (Fragment)                   | not tested                 | nucleic acid binding            | NA | NA | NA | NA | NA |

|         |        |                                                               |                            |                                 |    |    |    |    |    |
|---------|--------|---------------------------------------------------------------|----------------------------|---------------------------------|----|----|----|----|----|
| SRBD1   | B7Z6X7 | S1 RNA-binding domain-containing protein 1                    | not tested                 | nucleic acid binding            | NA | NA | NA | NA | NA |
| STAU2   | G5EA18 | Double-stranded RNA-binding protein<br>Staufen homolog 2      | not tested                 | nucleic acid binding            | NA | NA | NA | NA | NA |
| SUGP2   | E7ETX7 | SURP and G-patch domain-containing<br>protein 2               | not tested                 | nucleic acid binding            | NA | NA | NA | NA | NA |
| THRAP3  | Q9Y2W1 | Thyroid hormone receptor-associated protein<br>3              | not tested                 | transcription factors/cofactors | NA | NA | NA | NA | NA |
| TNRC6A  | H3BTQ1 | Trinucleotide repeat-containing gene 6A<br>protein (Fragment) | not tested                 | nucleic acid binding            | NA | NA | NA | NA | NA |
| TRO     | B1AKE8 | Trophinin (Fragment)                                          | not tested                 | protein binding                 | NA | NA | NA | NA | NA |
| TUBA1A  | G3V1U9 | Tubulin alpha-1A chain                                        | Interaction not replicated | cytoskeletal proteins           | NA | NA | NA | NA | NA |
| TUBA3C  | Q13748 | Tubulin alpha-3C/D chain                                      | not tested                 | cytoskeletal proteins           | NA | NA | NA | NA | NA |
| UBR5    | E7EMW7 | E3 ubiquitin-protein ligase UBR5                              | not tested                 | enzymes/enzyme modulators       | NA | NA | NA | NA | NA |
| YBX3    | P16989 | DNA-binding protein A                                         | not tested                 | enzymes/enzyme modulators       | NA | NA | NA | NA | NA |
| YLPM1   | H0YIQ2 | YLP motif-containing protein 1 (Fragment)                     | not tested                 | nucleic acid binding            | NA | NA | NA | NA | NA |
| ZFR     | Q96KR1 | Zinc finger RNA-binding protein                               | not tested                 | nucleic acid binding            | NA | NA | NA | NA | NA |
| ZNF318  | Q5VUA4 | Zinc finger protein 318                                       | not tested                 | nucleic acid binding            | NA | NA | NA | NA | NA |
| ZNF326  | Q5BKZ1 | DBIRD complex subunit ZNF326                                  | not tested                 | enzymes/enzyme modulators       | NA | NA | NA | NA | NA |
| CDC73   | Q6P1J9 | Parafibromin                                                  | not tested                 | enzymes/enzyme modulators       | NA | NA | NA | NA | NA |
| HNRNPA3 | E7EWI9 | Heterogeneous nuclear ribonucleoprotein A3                    | not tested                 | nucleic acid binding            | NA | NA | NA | NA | NA |
| F8W810  | F8W810 | unknwon function                                              | not tested                 | enzymes/enzyme modulators       | NA | NA | NA | NA | NA |

.0  
i1

162 **Supplementary Table 3. Single-cell RNA sequencing quality controls.** For each sample,  
 163 before and after filtering, the following data are compiled: number of cells (nCount), median  
 164 number of genes detected in all cells of the sample (nFeature\_median), median number of UMI  
 165 detected in all cells of the sample (nCount\_median), median percentage of mitochondrial content  
 166 in all cells of the sample (MT\_median), median percentage of ribosomal content in all cells of the  
 167 sample (Ribo\_median), the cell viability after thawing and the estimate fraction of contaminants  
 168 following SoupX analysis.  
 169

| Sample ID      | Status       | nCells | nFeature_<br>median | nCount_<br>median | MT_<br>median | Ribo_<br>median | Cell<br>viability<br>after<br>thawing | SoupX<br>estimate<br>contamination<br>fractions |
|----------------|--------------|--------|---------------------|-------------------|---------------|-----------------|---------------------------------------|-------------------------------------------------|
| C1             | Pre-filtered | 8874   | 1031                | 3600              | 10            | 43              | 96,3%                                 | NA                                              |
| C1             | Filtered     | 7305   | 1082                | 4023              | 10            | 47              | NA                                    | 5,3                                             |
| C26            | Pre-filtered | 7311   | 1558                | 4675              | 5             | 30              | 98,4%                                 | NA                                              |
| C26            | Filtered     | 5435   | 1747                | 5509              | 5             | 31              | NA                                    | 0,9                                             |
| C27            | Pre-filtered | 5299   | 1459                | 4790              | 4             | 28              | 98,3%                                 | NA                                              |
| C27            | Filtered     | 3816   | 1688                | 5932              | 4             | 37              | NA                                    | 3,1                                             |
| C2             | Pre-filtered | 11016  | 912                 | 2904              | 10            | 42              | 97,5%                                 | NA                                              |
| C2             | Filtered     | 9074   | 961                 | 3160              | 9             | 45              | NA                                    | 5,4                                             |
| C3             | Pre-filtered | 11787  | 554                 | 1530              | 5             | 40              | 97,0%                                 | NA                                              |
| C3             | Filtered     | 7171   | 651                 | 2034              | 5             | 46              | NA                                    | 5,2                                             |
| C4             | Pre-filtered | 11008  | 1016                | 2590              | 14            | 27              | 96,4%                                 | NA                                              |
| C4             | Filtered     | 7436   | 1125                | 3120              | 12            | 34              | NA                                    | 5                                               |
| C6             | Pre-filtered | 10740  | 982                 | 2816              | 13            | 31              | 95,5%                                 | NA                                              |
| C6             | Filtered     | 8320   | 1055                | 3185              | 12            | 36              | NA                                    | 2,1                                             |
| P1.II-2_LRBA   | Pre-filtered | 8822   | 1284                | 3255              | 9             | 29              | 97,1%                                 | NA                                              |
| P1.II-2_LRBA   | Filtered     | 8052   | 1313                | 3370              | 9             | 29              | NA                                    | 1,8                                             |
| P1.II-1_LRBA   | Pre-filtered | 5763   | 1236                | 4105              | 7             | 41              | 96,5%                                 | NA                                              |
| P1.II-1_LRBA   | Filtered     | 4805   | 1296                | 4471              | 7             | 43              | NA                                    | 2,2                                             |
| P2_NBEAL2      | Pre-filtered | 8714   | 1128                | 3470              | 10            | 37              | 98,4%                                 | NA                                              |
| P2_NBEAL2      | Filtered     | 7835   | 1168                | 3643              | 10            | 38              | NA                                    | 1,4                                             |
| P4.II-1_NBEAL2 | Pre-filtered | 9661   | 1523                | 4857              | 5             | 35              | 98,4%                                 | NA                                              |
| P4.II-1_NBEAL2 | Filtered     | 7535   | 1673                | 5553              | 5             | 37              | NA                                    | 3,1                                             |
| P3_LRBA        | Pre-filtered | 8551   | 1101                | 2888              | 11            | 28              | 96,1%                                 | NA                                              |
| P3_LRBA        | Filtered     | 7289   | 1163                | 3120              | 10            | 30              | NA                                    | 1,3                                             |
| P7_NBEAL2      | Pre-filtered | 9270   | 1292                | 4288              | 6             | 37              | 99%                                   | NA                                              |
| P7_NBEAL2      | Filtered     | 6979   | 1461                | 4978              | 6             | 41              | NA                                    | 5,2                                             |
| P2_LRBA        | Pre-filtered | 7084   | 1389                | 4062              | 10            | 25              | 94,8%                                 | NA                                              |
| P2_LRBA        | Filtered     | 6028   | 1508                | 4720              | 9             | 27              | NA                                    | 1                                               |
| P8_NBEAL2      | Pre-filtered | 10895  | 961                 | 4676              | 4             | 18              | 94,0%                                 | NA                                              |
| P8_NBEAL2      | Filtered     | 5851   | 1514                | 4907              | 6             | 36              | NA                                    | 5,4                                             |

|                |              |       |      |      |   |    |       |     |
|----------------|--------------|-------|------|------|---|----|-------|-----|
| P4_LRBA        | Pre-filtered | 8149  | 1581 | 4363 | 6 | 24 | 95,1% | NA  |
| P4_LRBA        | Filtered     | 6186  | 1762 | 5058 | 6 | 24 | NA    | 0,3 |
| P5.II-1_NBEAL2 | Pre-filtered | 10581 | 1331 | 4541 | 6 | 36 | 95,1% | NA  |
| P5.II-1_NBEAL2 | Filtered     | 7928  | 1494 | 5163 | 6 | 41 | NA    | 2,4 |

170

171

172

173

174

15 **Supplementary Table 4. Analyses and comparison of proteomics and transcriptomics data in activated T cells from healthy donors and**  
16 **NBEAL2 deficient patients.** After proteome analyses, 21 proteins are expressed in the tested controls but not in the NBEAL2 deficient patients  
17 (green). 23 proteins are expressed in NBEAL2 deficient patient samples but not in healthy donors (in yellow). 4 proteins have different protein  
18 expression in NBEAL2 deficient patients compared to controls (in blue). The mean normalized data count of the transcripts coding for the identified  
19 proteins have been reported in the last columns of the table. The ratio between normalized data count of the NBEAL2 deficient patients versus the  
20 controls have been calculated.

21



| Proteome data |                                                                                       |          |        |                   |          |          |            |            |                 | Bulk RNA Seq data        |                                 |                           |
|---------------|---------------------------------------------------------------------------------------|----------|--------|-------------------|----------|----------|------------|------------|-----------------|--------------------------|---------------------------------|---------------------------|
| Protein IDs   | Protein names                                                                         | HUGO-ID  | FC     | Claspatient.p val | CtrlS5   | CtrlS7   | patient_P7 | patient_P6 | GENEID          | Mean data count controls | Mean data count NBEAL2 patients | ratio patients / controls |
| Q8TF46        | DIS3-like exonuclease 1                                                               | DIS3L    | -217,6 | 0,00570998        | 2,76E+08 | 1,83E+08 | 0,00E+00   | 0,00E+00   | ENSG00000166938 | 1734,7                   | 1795,8                          | 1,04                      |
| Q6ZNJ1        | Neurobeachin-like protein 2                                                           | NBEAL2   | -83,3  | 0,02508958        | 5,38E+07 | 1,25E+08 | 0,00E+00   | 0,00E+00   | ENSG00000160796 | 18351,6                  | 17203,6                         | 0,94                      |
| Q9P1Z2        | Calcium-binding and coiled-coil domain-containing protein 1                           | CALCOCO1 | -75,2  | 0,00211636        | 6,98E+07 | 8,83E+07 | 0,00E+00   | 0,00E+00   | ENSG0000012822  | 2861,0                   | 3004,7                          | 1,05                      |
| O60784        | Target of Myb protein 1                                                               | TOM1     | -66,9  | 0,00675784        | 5,60E+07 | 8,51E+07 | 0,00E+00   | 0,00E+00   | ENSG00000100284 | 1113,9                   | 1093,1                          | 0,98                      |
| Q01543        | Friend leukemia integration 1 transcription factor                                    | FLI1     | -40,0  | 0,00503057        | 3,50E+07 | 4,92E+07 | 0,00E+00   | 0,00E+00   | ENSG00000151702 | 8222,4                   | 8377,0                          | 1,02                      |
| Q86X10        | Ral GTPase-activating protein subunit beta                                            | RALGAPB  | -37,1  | 0,00283921        | 4,39E+07 | 3,41E+07 | 0,00E+00   | 0,00E+00   | ENSG00000170471 | 3490,5                   | 3442,7                          | 0,99                      |
| Q9NRR5        | Ubiquilin-4                                                                           | UBQLN4   | -35,8  | 2,89E-06          | 3,77E+07 | 3,74E+07 | 0,00E+00   | 0,00E+00   | ENSG00000160803 | 2665,2                   | 2693,3                          | 1,01                      |
| Q676U5        | Autophagy-related protein 16-1                                                        | ATG16L1  | -35,1  | 0,00012094        | 3,78E+07 | 3,59E+07 | 0,00E+00   | 0,00E+00   | ENSG00000085978 | 2221,6                   | 2235,7                          | 1,01                      |
| P53701        | Cytochrome c-type heme lyase                                                          | HCCS     | -31,5  | 0,03696723        | 4,87E+07 | 1,92E+07 | 0,00E+00   | 0,00E+00   | ENSG0000004961  | 676,5                    | 682,1                           | 1,01                      |
| P48553        | Trafficking protein particle complex subunit 10                                       | TRAPPC10 | -29,4  | 0,00061757        | 2,91E+07 | 3,26E+07 | 0,00E+00   | 0,00E+00   | ENSG00000160218 | 3471,2                   | 3421,1                          | 0,99                      |
| O00330        | Pyruvate dehydrogenase protein X component, mitochondrial                             | PDHX     | -25,5  | 0,00606176        | 2,22E+07 | 3,15E+07 | 0,00E+00   | 0,00E+00   | ENSG00000110435 | 780,3                    | 765,5                           | 0,98                      |
| Q9BUF5        | Tubulin beta-6 chain                                                                  | TUBB6    | -22,9  | 0,00013052        | 2,34E+07 | 2,46E+07 | 0,00E+00   | 0,00E+00   | ENSG00000176014 | 235,1                    | 207,1                           | 0,88                      |
| Q6NYC1        | Bifunctional arginine demethylase and lysyl-hydroxylase JMJD6                         | JMJD6    | -22,4  | 0,01673386        | 1,71E+07 | 3,04E+07 | 0,00E+00   | 0,00E+00   | ENSG00000070495 | 1723,9                   | 1729,8                          | 1,00                      |
| Q01581        | Hydroxymethylglutaryl-CoA synthase, cytoplasmic                                       | HMGCS1   | -21,4  | 0,03604647        | 1,37E+07 | 3,23E+07 | 0,00E+00   | 0,00E+00   | ENSG00000112972 | 2221,3                   | 2181,7                          | 0,98                      |
| P13797        | Plastin-3                                                                             | PLS3     | -20,3  | 0,02475765        | 2,88E+07 | 1,44E+07 | 0,00E+00   | 0,00E+00   | ENSG00000102024 | 27,3                     | 13,8                            | 0,50                      |
| Q15785        | Mitochondrial import receptor subunit TOM34                                           | TOMM34   | -14,1  | 0,00356799        | 1,66E+07 | 1,31E+07 | 0,00E+00   | 0,00E+00   | ENSG00000025772 | 1206,9                   | 1303,3                          | 1,08                      |
| Q9NV88        | Integrator complex subunit 9                                                          | INTS9    | -13,1  | 0,00716696        | 1,15E+07 | 1,60E+07 | 0,00E+00   | 0,00E+00   | ENSG00000104299 | 1174,9                   | 1198,6                          | 1,02                      |
| Q6NUQ4        | Transmembrane protein 214                                                             | TMEM214  | -12,3  | 0,00020494        | 1,32E+07 | 1,25E+07 | 0,00E+00   | 0,00E+00   | ENSG00000119777 | 4049,4                   | 4068,9                          | 1,00                      |
| P81605        | Dermcidin;Survival-promoting peptide;DCD-1                                            | DCD      | -10,3  | 0,00726378        | 1,25E+07 | 9,16E+06 | 0,00E+00   | 0,00E+00   | ENSG00000161634 | 0,0                      | 0,0                             | #DIV/0!                   |
| O75027        | ATP-binding cassette sub-family B member 7, mitochondrial                             | ABCB7    | -8,5   | 0,0002364         | 8,73E+06 | 9,20E+06 | 0,00E+00   | 0,00E+00   | ENSG00000131269 | 988,7                    | 1016,7                          | 1,03                      |
| O95819        | Mitogen-activated protein kinase kinase kinase 4                                      | MAP4K4   | -7,2   | 0,00364134        | 6,79E+06 | 8,24E+06 | 0,00E+00   | 0,00E+00   | ENSG00000071054 | 6491,1                   | 6429,5                          | 0,99                      |
| Q9H330        | Transmembrane protein 245                                                             | TMEM245  | -2,9   | 0,01595301        | 3,38E+08 | 2,70E+08 | 1,10E+08   | 9,69E+07   | ENSG00000106771 | 3621,8                   | 3772,6                          | 1,04                      |
| Q5TEJ8        | Protein THEMIS2                                                                       | THEMIS2  | 2,0    | 0,03388873        | 2,11E+07 | 2,22E+07 | 3,74E+07   | 4,72E+07   | ENSG00000130775 | 2104,8                   | 2254,2                          | 1,07                      |
| Q99704        | Docking protein 1                                                                     | DOK1     | 2,1    | 0,03791746        | 4,91E+07 | 5,93E+07 | 9,95E+07   | 1,23E+08   | ENSG00000115325 | 1512,3                   | 1591,6                          | 1,05                      |
| Q8NFF5        | FAD synthase;Molybdenum cofactor biosynthesis protein-like region;FAD synthase region | FLAD1    | 2,7    | 0,0135542         | 3,17E+07 | 2,96E+07 | 9,17E+07   | 7,47E+07   | ENSG00000160688 | 1338,1                   | 1319,8                          | 0,99                      |
| O00635        | E3 ubiquitin-protein ligase TRIM38                                                    | TRIM38   | 7,2    | 0,02251141        | 0,00E+00 | 0,00E+00 | 9,39E+06   | 5,75E+06   | ENSG00000112343 | 2762,5                   | 2877,4                          | 1,04                      |
| P52747        | Zinc finger protein 143                                                               | ZNF143   | 10,4   | 0,02019008        | 0,00E+00 | 0,00E+00 | 1,39E+07   | 8,20E+06   | ENSG00000166478 | 850,7                    | 831,5                           | 0,98                      |
| Q9H9B1        | Histone-lysine N-methyltransferase EHMT1                                              | EHMT1    | 14,8   | 0,01199067        | 0,00E+00 | 0,00E+00 | 1,90E+07   | 1,22E+07   | ENSG00000181090 | 4675,6                   | 4874,1                          | 1,04                      |
| Q5F1R6        | DnaJ homolog subfamily C member 21                                                    | DNAJC21  | 16,1   | 0,00142791        | 0,00E+00 | 0,00E+00 | 1,56E+07   | 1,82E+07   | ENSG00000168724 | 2201,5                   | 2248,0                          | 1,02                      |
| Q15154        | Pericentriolar material 1 protein                                                     | PCM1     | 16,4   | 0,00305939        | 0,00E+00 | 0,00E+00 | 1,92E+07   | 1,53E+07   | ENSG00000078674 | 6562,9                   | 6051,5                          | 0,92                      |
| Q8N201        | Integrator complex subunit 1                                                          | INTS1    | 19,8   | 0,00880531        | 0,00E+00 | 0,00E+00 | 2,50E+07   | 1,67E+07   | ENSG00000164880 | 8018,0                   | 8024,7                          | 1,00                      |
| Q32P28        | Prolyl 3-hydroxylase 1                                                                | LEPRE1   | 21,6   | 0,00836349        | 0,00E+00 | 0,00E+00 | 2,73E+07   | 1,83E+07   | ENSG00000117385 | 1782,4                   | 1757,9                          | 0,99                      |
| Q8IZ73        | RNA pseudouridylate synthase domain-containing protein 2                              | RPUSD2   | 21,8   | 0,03896478        | 0,00E+00 | 0,00E+00 | 1,36E+07   | 3,34E+07   | ENSG00000166133 | 681,8                    | 693,3                           | 1,02                      |
| O75179        | Ankyrin repeat domain-containing protein 17                                           | ANKRD17  | 23,4   | 0,00807712        | 0,00E+00 | 0,00E+00 | 2,95E+07   | 1,98E+07   | ENSG00000132466 | 6710,8                   | 6373,1                          | 0,95                      |
| Q9NX58        | Cell growth-regulating nucleolar protein                                              | LYAR     | 23,9   | 0,04150994        | 0,00E+00 | 0,00E+00 | 3,71E+07   | 1,44E+07   | ENSG00000145220 | 2168,6                   | 2182,5                          | 1,01                      |
| Q99856        | AT-rich interactive domain-containing protein 3A                                      | ARID3A   | 24,6   | 0,00579601        | 0,00E+00 | 0,00E+00 | 3,02E+07   | 2,15E+07   | ENSG00000116017 | 2365,6                   | 2441,3                          | 1,03                      |
| P16989        | Y-box-binding protein 3                                                               | YBX3     | 25,8   | 0,02238906        | 0,00E+00 | 0,00E+00 | 3,66E+07   | 1,84E+07   | ENSG00000060138 | 2727,8                   | 3604,6                          | 1,32                      |
| Q96GD4        | Aurora kinase B                                                                       | AURKB    | 28,1   | 0,00151378        | 0,00E+00 | 0,00E+00 | 2,69E+07   | 3,21E+07   | ENSG00000178999 | 4659,9                   | 4701,1                          | 1,01                      |
| Q99700        | Ataxin-2                                                                              | ATXN2    | 30,3   | 0,00054331        | 0,00E+00 | 0,00E+00 | 3,01E+07   | 3,35E+07   | ENSG00000204842 | 2155,0                   | 2203,9                          | 1,02                      |
| O15084        | Serine/threonine-protein phosphatase 6 regulatory ankyrin repeat subunit A            | ANKRD28  | 30,4   | 0,02012491        | 0,00E+00 | 0,00E+00 | 2,19E+07   | 4,27E+07   | ENSG00000206560 | 2394,9                   | 2380,2                          | 0,99                      |
| Q8TDB6        | E3 ubiquitin-protein ligase DTX3L                                                     | DTX3L    | 30,8   | 0,00108547        | 0,00E+00 | 0,00E+00 | 2,99E+07   | 3,48E+07   | ENSG00000163840 | 5050,5                   | 5177,2                          | 1,03                      |
| Q07065        | Cytoskeleton-associated protein 4                                                     | CKAP4    | 32,1   | 0,01388882        | 0,00E+00 | 0,00E+00 | 4,32E+07   | 2,48E+07   | ENSG00000136026 | 435,7                    | 381,7                           | 0,88                      |
| Q9NZ52        | ADP-ribosylation factor-binding protein GGA3                                          | GGA3     | 34,8   | 0,00235868        | 0,00E+00 | 0,00E+00 | 3,24E+07   | 4,07E+07   | ENSG00000125447 | 4476,6                   | 4582,7                          | 1,02                      |
| Q9Y5Y4        | Prostaglandin D2 receptor 2                                                           | PTGDR2   | 43,5   | 0,02288745        | 0,00E+00 | 0,00E+00 | 6,32E+07   | 2,98E+07   | ENSG00000183134 | 1263,5                   | 1667,1                          | 1,32                      |
| P20248        | Cyclin-A2                                                                             | CCNA2    | 44,8   | 0,01001673        | 0,00E+00 | 0,00E+00 | 5,88E+07   | 3,60E+07   | ENSG00000145386 | 5900,1                   | 5971,3                          | 1,01                      |
| Q9NXC5        | WD repeat-containing protein mio                                                      | MIOS     | 58,7   | 0,01285834        | 0,00E+00 | 0,00E+00 | 7,96E+07   | 4,48E+07   | ENSG00000164654 | 1041,9                   | 1091,7                          | 1,05                      |
| Q96KQ7        | Histone-lysine N-methyltransferase EHMT2                                              | EHMT2    | 62,2   | 0,00030407        | 0,00E+00 | 0,00E+00 | 6,81E+07   | 6,24E+07   | ENSG00000204371 | 4484,3                   | 4449,8                          | 0,99                      |
| Q8NE62        | Choline dehydrogenase, mitochondrial                                                  | CHDH     | 65,2   | 0,00134269        | 0,00E+00 | 0,00E+00 | 7,47E+07   | 6,21E+07   | ENSG00000016391 | 988,3                    | 896,0                           | 0,91                      |

**Supplementary Table 5. List of key antibodies used in the present study.**

| Antibodies                                                  | Supplier                | Catalog number and RRID             | Dilution         |
|-------------------------------------------------------------|-------------------------|-------------------------------------|------------------|
| Brilliant Violet 510™ anti-human TCR α/β Antibody           | Biolegend               | Cat# 306734,<br>RRID:AB_2650821     | dilution<br>1:40 |
| cFluor™ YG584 Anti-Human CD4 (SK3)                          | Cytek                   | Cat# R7-20041,<br>RRID:AB_2885083   | dilution<br>1:80 |
| CD25 Monoclonal Antibody (CD25-3G10), PE-Alexa Fluor 700    | Thermofisher Scientific | Cat# MHCD2524,<br>RRID:AB_2539740   | dilution<br>1:20 |
| PE/Dazzle™ 594 anti-human CD152 (CTLA-4) Antibody           | Biolegend               | Cat# 369616,<br>RRID:AB_2632878     | dilution<br>1:20 |
| BUV805 Mouse Anti-Human CD8                                 | BD Biosciences          | Cat# 612889,<br>RRID:AB_2833078     | dilution<br>1:80 |
| PerCP/Cyanine5.5 anti-human CD3 Antibody                    | Biolegend               | Cat# 317336,<br>RRID:AB_2561628     | 1.5ug/mL         |
| Brilliant Violet 510™ anti-human CD4                        | Sony                    | Cat# 2187220,<br>RRID:AB_2905654    | 2.5 µg/ml        |
| PE-Cy™7 Mouse Anti-Human CD25                               | BD Biosciences          | Cat# 561405,<br>RRID:AB_10646034    | 1.5ug/mL         |
| PE/Cy5 anti-human CD45RA                                    | Sony                    | Cat# 2120550,<br>RRID:AB_2905655    | dilution<br>1:40 |
| FITC anti-human CD127 (IL-7Rα)                              | Sony                    | Cat# 2356560,<br>RRID:AB_2905656    | 3ug/mL           |
| PE Mouse Anti-Human CTLA-4                                  | BD Biosciences          | Cat# 555853,<br>RRID:AB_396176      | 1.25ug/mL        |
| FOXP3 Monoclonal Antibody (PCH101), APC, eBioscience™       | Thermofisher Scientific | Cat# 17-4776-42,<br>RRID:AB_1603280 | 2.5ug/mL         |
| HELIOS Monoclonal Antibody (22F6), eFluor 450, eBioscience™ | Thermofisher Scientific | Cat# 48-9883-42,<br>RRID:AB_2574136 | 2.5ug/mL         |
| Anti-Human CD134/OX40 (ACT35) - 142Nd - 100 Tests           | Fluidigm                | Cat# 3142018B,<br>RRID:AB_2905646   | 2uL per sample   |
| Anti-Human CD278/ICOS (C398.4A) - 175Lu - 100 Tests         | Fluidigm                | Cat# 3175039B,<br>RRID:AB_2905647   | 2uL per sample   |
| Anti-Human CD357 (621)-159Tb—100 Tests                      | Fluidigm                | Cat# 3159020B,<br>RRID:AB_2858232   | 2uL per sample   |
| Anti-Human CD279/PD-1 (EH12.2H7) - 165Ho - 100 Tests        | Fluidigm                | Cat# 3165042B,<br>RRID:AB_2905648   | 2uL per sample   |
| Anti-Human TIGIT (MBSA43) - 209Bi - 100 Tests               | Fluidigm                | Cat# 3209013B,<br>RRID:AB_2905649   | 2uL per sample   |
| Anti-Human CD366/Tim-3 (F38-2E2) - 169Tm - 100 Tests        | Fluidigm                | Cat# 3169028B,<br>RRID:AB_2905650   | 2uL per sample   |
| PE/Dazzle™ 594 anti-human TCR α/β Antibody                  | Biolegend               | Cat# 306726,<br>RRID:AB_2566599     | 1:50e            |

|                                                                 |                         |                                     |         |
|-----------------------------------------------------------------|-------------------------|-------------------------------------|---------|
| Brilliant Violet 421™ anti-human CD152 (CTLA-4) Antibody        | Biolegend               | Cat# 369606,<br>RRID:AB_2616795     | 1:20e   |
| PE/Cyanine7 anti-human CD25 Antibody                            | Biolegend               | Cat# 356108,<br>RRID:AB_2561975     | 1:50e   |
| Brilliant Violet 605™ anti-human CD4 Antibody                   | Biolegend               | Cat# 317438,<br>RRID:AB_11218995    | 1:50e   |
| Brilliant Violet 711™ anti-human CD8a Antibody                  | Biolegend               | Cat# 310144,<br>RRID:AB_2562906     | 1:50e   |
| APC-R700 Mouse Anti-Human CD127                                 | BD Biosciences          | Cat #565185,<br>RRID:AB_2739099     | 1:50e   |
| BUV395 Mouse Anti-Human CD45RA                                  | BD Biosciences          | Cat# 740315,<br>RRID:AB_2740052     | 1:50e   |
| HELIOS Monoclonal Antibody (22F6), PerCP-eFluor™ 710            | Thermofisher Scientific | Cat# 46-9883-42,<br>RRID:AB_2573924 | 1:20e   |
| Recombinant Anti-CTLA4 antibody [CAL49]                         | Abcam                   | Cat# Ab237712,<br>RRID:AB_2905652   | 1:1000e |
| Anti-LRBA antibody produced in rabbit                           | Sigma                   | Cat# HPA-023597,<br>RRID:AB_1853256 | 1:1000e |
| Anticorps CTLA-4 (F-8)                                          | SantaCruz Biotechnology | Cat# sc-376016,<br>RRID:AB_10988256 | 1:200e  |
| Mouse monoclonal [SB62a] Anti-Rabbit IgG light chain (HRP)      | Abcam                   | Cat# ab99697,<br>RRID:AB_10673897   | 1:1000e |
| Donkey Anti-Mouse IgG Antibody, HRP conjugate, Species Adsorbed | Sigma Aldrich           | Cat# AP192P,<br>RRID:AB_11213904    | 1:1000e |
| Recombinant Anti-NBEAL2 antibody [EPR14501(B)] - N-terminal     | Abcam                   | Cat# ab187162,<br>RRID:AB_2905645   | 1:1000e |

184

185

186

187

**Supplementary Table 6. List of key reagents used in the present study.**

| Key reagents                                               | Supplier                    | Catalog number         |
|------------------------------------------------------------|-----------------------------|------------------------|
| Dynabeads™ Human T-Expander CD3/CD28                       | Thermofisher Scientific     | Cat#11141D             |
| Live/Dead Fixable Blue Viability Kit                       | Thermofisher Scientific     | Cat# L23105            |
| Zombie NIR™ Fixable Viability Kit                          | Biolegend                   | Cat# 423106            |
| TruStain FcX                                               | Biolegend                   | Cat# 422302            |
| Sodium Heparin Salt                                        | Sigma Aldrich               | Cat# H3149-10KU        |
| Cal-Lyse™ Lysing Solution (with formaldehyde and EGTA)     | Thermofisher Scientific     | Cat# GAS-010S100       |
| Pierce™ 16% Formaldehyde (w/v), Methanol-free              | Thermofisher Scientific     | Cat# 28906             |
| RIPA Lysis and Extraction Buffer                           | Thermofisher Scientific     | Cat# 89900             |
| Phosphatase Inhibitor Cocktail 2                           | Sigma Aldrich               | Cat# P5726             |
| Phosphatase Inhibitor Cocktail 3                           | Sigma Aldrich               | Cat# P0044             |
| Halt™ Protease Inhibitor Cocktail (100X)                   | Thermofisher Scientific     | Cat# 87786             |
| Alt-R® S.p. Cas9 Nuclease V3, 5 mg                         | Integrated DNA Technologies | Cat# 10000735          |
| Alt-R® Cas9 Electroporation Enhancer, 10 nmol              | Integrated DNA Technologies | Cat# 1075916           |
| Nuclease-free Duplex Buffer                                | Integrated DNA Technologies | Cat# 1072570           |
| DSP (dithiobis(succinimidyl propionate)), Lomant's Reagent | Thermofisher Scientific     | Cat# 22586             |
| UltraPure™ 1 M Tris-HCl Buffer, pH 7.5                     | Thermofisher Scientific     | Cat# 15567-027         |
| Sodium chloride solution                                   | Sigma Aldrich               | Cat# S5150-1L          |
| n-Octyl-β-D-glucopyranoside, ULTROL® Grade                 | Sigma Aldrich               | Cat# 494460-5gm        |
| Sodium fluoride                                            | Sigma Aldrich               | Cat# S7920-100g        |
| Sodium pyrophosphate tetrabasic decahydrate                | Sigma Aldrich               | Cat# S6422-100g        |
| UltraCruz® Protease Inhibitor Cocktail Tablet              | Santa Cruz Biotechnology    | Cat# sc-29130          |
| Sodium Orthovanadate (Vanadate)                            | New England Biolabs         | Cat# P0758L            |
| Benzonase® Nuclease                                        | Sigma Aldrich               | Cat# E1014-25KU        |
| SepMate kit                                                | Stemcell Technologies       | Cat# 85450             |
| EasySep™ Human T Cell Isolation Kit                        | Stemcell Technologies       | Cat# 17951             |
| Foxp3 / Transcription Factor Staining Buffer kit           | eBiosciences                | Cat# 00-5523-00        |
| Cytofix CytoPerm kit                                       | BD Biosciences              | Cat# 554714            |
| Pierce™ BCA Protein Assay Kit                              | Thermofisher Scientific     | Cat# 23225             |
| Human Fas Ligand/TNFSF6 Quantikine ELISA Kit               | R&D Systems                 | Cat# DFL100            |
| Elecsys® Active B12 (holoTC) kit                           | Roche Diagnostics           | Cat# 07 713 207<br>190 |
| Maxpar Direct Immune Profiling Assay                       | Fluidigm                    | Cat# 201325            |
| Maxpar® X8 Antibody Labeling Kit, 162Dy—4 Rxn              | Fluidigm                    | Cat# 201162A           |
| Maxpar® MCP9 Antibody Labeling Kit, 116Cd—4 Rxn            | Fluidigm                    | Cat# 201116A           |

|                                                     |                          |                 |
|-----------------------------------------------------|--------------------------|-----------------|
| P2 Primary Cell 4D-Nucleofector™ X Kit S            | Lonza                    | Cat# V4XP-2032  |
| Pierce™ Direct IP Kit                               | Thermofisher Scientific  | Cat# 26148      |
| Chromium Single Cell 3' Library & Gel Bead Kit v2   | 10X Genomics             |                 |
| Chromium Single Cell 3' Library & Gel Bead Kit v3   | 10X Genomics             | Cat# PN-1000075 |
| Chromium Single Cell 3' Library & Gel Bead Kit v3.1 | 10X Genomics             |                 |
| Pierce™ Spin Cups - Paper Filter                    | Thermofischer Scientific | Cat# 69700      |

189

190

191 **Supplementary Table 7. List of softwares used in this study.**

192

| <b>Softwares</b>                     | <b>Supplier</b>                             | <b>Link</b>                                                                                                                                                                                                                                                     |
|--------------------------------------|---------------------------------------------|-----------------------------------------------------------------------------------------------------------------------------------------------------------------------------------------------------------------------------------------------------------------|
| Ingenuity Pathway Analysis v57662101 | QIAGEN                                      | <a href="https://digitalinsights.qiagen.com/products-overview/discovery-insights-portfolio/analysis-and-visualization/qiagen-ipa/">https://digitalinsights.qiagen.com/products-overview/discovery-insights-portfolio/analysis-and-visualization/qiagen-ipa/</a> |
| Seurat v3.1                          | (Stuart et al., 2019)                       | <a href="https://satijalab.org/seurat/">https://satijalab.org/seurat/</a>                                                                                                                                                                                       |
| Flowjo v10.7                         | BD Biosciences                              | <a href="https://www.flowjo.com/solutions/flowjo/downloads">https://www.flowjo.com/solutions/flowjo/downloads</a>                                                                                                                                               |
| Enrich R                             | (Chen et al., 2013) (Kuleshov et al., 2016) | <a href="https://maayanlab.cloud/Enrichr/">https://maayanlab.cloud/Enrichr/</a>                                                                                                                                                                                 |
| CyTOF software version 6.7.1014      | Fluidigm                                    | <a href="https://www.fluidigm.com/software">https://www.fluidigm.com/software</a>                                                                                                                                                                               |
| MaxQuant software Version. 1.6.17.0  |                                             | <a href="https://www.maxquant.org/download_asset/maxquant/latest">https://www.maxquant.org/download_asset/maxquant/latest</a>                                                                                                                                   |
| GraphPAD Prism v9                    | GraphPad                                    | <a href="https://www.graphpad.com/scientific-software/prism/">https://www.graphpad.com/scientific-software/prism/</a>                                                                                                                                           |
| STRING v.11.5                        | (Szklarczyk et al., 2020)                   | <a href="https://version-11-5.string-db.org/cgi/network?networkId=bjY9nFy8le23">https://version-11-5.string-db.org/cgi/network?networkId=bjY9nFy8le23</a>                                                                                                       |
| CellRanger V3.1                      | 10x Genomics                                | <a href="https://support.10xgenomics.com/single-cell-gene-expression/software/downloads/latest">https://support.10xgenomics.com/single-cell-gene-expression/software/downloads/latest</a>                                                                       |

193

194

195

196 **Supplementary Table 8. List of the single guide RNA used for CRISPR-Cas9 knock-**  
 197 **down in the present study.**  
 198

| Guide name              | Guide sequence (without the PAM) | GC % | Sens    | Supplier                    | Format                                         |
|-------------------------|----------------------------------|------|---------|-----------------------------|------------------------------------------------|
| LRBA ex3                | TTACGTGCCAAGCAGAAGTC             | 50%  | Forward | Integrated DNA Technologies | Custom order in tube, Alt R Cas9 gRNA, 10 nmol |
| LRBA ex22               | CCCACTCATATTTGACTGCA             | 45%  | Forward | Integrated DNA Technologies | Custom order in tube, Alt R Cas9 gRNA, 10 nmol |
| LRBA ex44 (inefficient) | GACAAATCTCTGAAGTTGGT             | 40%  | Forward | Integrated DNA Technologies | Custom order in tube, Alt R Cas9 gRNA, 10 nmol |
| LRBA ex50               | CAACTCCCCTGTTACTCAG              | 55%  | Reverse | Integrated DNA Technologies | Custom order in tube, Alt R Cas9 gRNA, 10 nmol |
| LRBA ex55               | GTTATCATCTGTTCCATCG              | 40%  | Forward | Integrated DNA Technologies | Custom order in tube, Alt R Cas9 gRNA, 10 nmol |
| NBEAL2 ex4              | GGCCTGCCTCTATGTTCTCC             | 60%  | Reverse | Integrated DNA Technologies | Custom order in tube, Alt R Cas9 gRNA, 10 nmol |
| NBEAL2 ex14             | TCTTTACCAGCAGCGGCTCA             | 55%  | Forward | Integrated DNA Technologies | Custom order in tube, Alt R Cas9 gRNA, 10 nmol |
| NBEAL2 ex33             | CCTGGAGGGGCTACGCTACA             | 65%  | Forward | Integrated DNA Technologies | Custom order in tube, Alt R Cas9 gRNA, 10 nmol |
| NBEAL2 ex37             | TACGGAACCAGGTGTACTION            | 55%  | Forward | Integrated DNA Technologies | Custom order in tube, Alt R Cas9 gRNA, 10 nmol |
| NBEAL2 ex 41            | CACCGAGTGGAAGTCCCGT              | 65%  | Reverse | Integrated DNA Technologies | Custom order in tube, Alt R Cas9 gRNA, 10 nmol |
| NBEAL2 ex 48            | GGAAAGCTGCTATTCAGCGG             | 55%  | Forward | Integrated DNA Technologies | Custom order in tube, Alt R Cas9 gRNA, 10 nmol |

199  
 200

201

**Supplementary Table 9. List of culture media used in the present study.**

| <b>Medium name</b>                | <b>Recipe</b>                                                                                                                                                                                                                                                                                                      |
|-----------------------------------|--------------------------------------------------------------------------------------------------------------------------------------------------------------------------------------------------------------------------------------------------------------------------------------------------------------------|
| <b>Complete panserin:</b>         | Panserin 401 medium (PAN BIOTECH, # P04-710401), supplemented with 5% human AB serum, 1% penicillin/streptomycin (ThermoFisher, 15140122) and 1% L-glutamine (ThermoFisher, 25030081) and filtered with a unit Nalgene Rapid-Flow single-use sterile filtration unit with PES membrane (ThermoFisher, # 568-0010). |
| <b>Complete Immunocult (IC-C)</b> | ImmunoCult - XF T Cell Expansion Medium (StemCell, #10981), supplemented with 2% by volume fetal bovine serum (LifeTechnologies, #10500) and 1% Penicillin/Streptomycin (Pen/Strep) (LifeTechnologies, #15140-122).                                                                                                |
| <b>Complete X-Vivo15:</b>         | X-VIVO 15 medium without Gentamycin or Phenol Red (Lonza, #BE02-061Q), supplemented with 1% Penicillin/Streptomycin (LifeTechnologies, #15140-122).                                                                                                                                                                |

202

203

204



205 **Supplementary Table 10. Recipe for the octyl buffer used in the immunoprecipitation**  
206 **experiments in the present study.**

207

| <b>For 100mL solution</b> |                                             |                          |                  |
|---------------------------|---------------------------------------------|--------------------------|------------------|
|                           | <b>Reagents</b>                             | <b>Supplier</b>          | <b>Reference</b> |
| 2,5 mL (1M)               | 25mM Tris                                   | ThermoFischer Scientific | 15567-027        |
| 3 mL (5M)                 | 150mM NaCl                                  | Sigma Aldrich            | S5150-1L         |
| 1,2g (1,2%)               | n-Octyl- $\beta$ -D-glucopyranoside         | Sigma Aldrich            | 494460-5gm       |
| 64mg                      | NaF                                         | Sigma Aldrich            | S7920-100g       |
| 440mg                     | Sodium pyrophosphate tetrabasic decahydrate | Sigma Aldrich            | S6422-100g       |
| 2 pastilles               | complete protease inhibitor cocktail        | ChemCruz                 | sc-29130         |
| 1mL                       | Na <sub>3</sub> VO <sub>4</sub> 100mM       | New England Biolabs      | P0758L           |
| 92mL                      | H <sub>2</sub> O                            |                          |                  |

208

209

210

211

212 **Supplementary methods**

213 For detailed references of antibodies, key reagents and softwares used in this study, please  
214 refer to supplemental Tables S5, S6 and S7.

215 **Cells and plasma isolation**

216 Peripheral blood samples were collected on lithium heparin tubes. Plasma were isolated after 5  
217 min of centrifugation at 1030g, and frozen at -20°C prior to FAS ligand and vitamin B12 assays  
218 (see below). Peripheral blood mononuclear cells (PBMC) were isolated by density gradient  
219 centrifugation (940g without break for 30 minutes) using Ficoll (Eurobio Scientific). After  
220 centrifugation, cells were washed with Phosphate-buffered saline (PBS) (Thermo Fisher scientific).  
221 The pellet was resuspended in PBS and cells were centrifuged at 330g for 5 minutes. Finally, the  
222 PBMCs pellet was frozen in a freezing medium containing 10% of dimethyl sulfoxide (DMSO)  
223 (Sigma Aldrich) and 90% of Fetal Bovine Serum (FBS) (GIBCO, Thermo Fisher scientific). Samples  
224 were stored in liquid nitrogen.

225 **T cell isolation**

226 For the isolation of a large quantity of T cells, apheresis rings were obtained from Etablissement  
227 Français du Sang (EFS). PBMC were recovered using the SepMate kit (Stemcell Technologies, #  
228 85450), according to the supplier's protocol. T cells were then isolated using the EasySep™ Human  
229 T Cell Isolation Kit (Stemcell Technologies, #17951) following the supplier's protocol. The cells  
230 were then frozen and cryopreserved at -150°C.

231 **Culture media**

232 The media used in this study are detailed in Supplemental Table S9.

233 **T lymphocytes activation and culture**

234 T cells activation was carried out from the PBMC of patients or of healthy donors coming from the  
235 EFS. T cells were activated by binding CD3/CD28 receptors with Dynabeads (Thermofisher,  
236 #11141D). Cells were cultured at 1.106/mL/10 µL of Dynabeads in complete Panserin medium.  
237 After 3 days of culture, cells were centrifuged on Ficoll and then recultured in complete Panserin  
238 with interleukin-2 (IL-2) at 100 international units/mL (U/mL). Every two days, cell expansion was  
239 continued by adding Panserin complete with IL-2.

240 **Protein extraction**

241 Proteins were extracted in RIPA lysis buffer (Thermo Fisher, # 89900) supplemented with cocktails  
242 of anti-phosphatases (Sigma-Aldrich, #P5726 and #P0044) and anti-protease (Thermo Fisher, #  
243 87786). After 30 min of incubation on ice and centrifugation for 5 min at 3000g, the supernatant  
244 containing the extracted proteins was recovered. Proteins were stored at -20°C (for short term use)  
245 or -80°C. The concentrations of the protein lysates were measured just before use using the Pierce  
246 BCA Protein Assay kit (Thermo Fisher, #23225).

247 **NBEAL2 immunoblotting**

248 Samples were denatured and reduced with NuPAGE LDS Sample buffer 4X (Thermo Fisher,  
249 #NP0007) and NuPAGE sample reducing agent 10X (Thermo Fisher, NP009). The migration was  
250 carried out on NuPAGE 3-8% Tris Acetate gels (Thermo Fisher, #EA0378BOX) at 150V for 2h. The  
251 transfer was done on PVDF membranes (Thermo Fisher, #IB24002) with the iBlot 2 dry transfer  
252 system (Thermo Fisher, #IB21001) using a 10min program at 25V constant. The membranes were  
253 blocked with 5% milk in TBS (Tris Buffer saline) Tween 0.1% for 1 hour at RT (room temperature)  
254 with shaking, then incubated with the recombinant rabbit primary antibody Anti-NBEAL2  
255 [EPR14501( B)] - N-terminal (Abcam, #ab187162) diluted to 1:1000 with stirring at 4° C overnight.  
256 After 3 washes with TBS Tween 0.1% (TBST), the anti-rabbit secondary antibody coupled to HRP  
257 (Horse Radish Peroxidase) was incubated for 1 hour at RT with stirring at a dilution of 1:10,000th  
258 in 5% milk TBST. After 3 washes with TBST, the membrane was incubated for 5 min, at room  
259 temperature (RT), in the dark, with the HRP substrate, contained in the commercial solution  
260 SuperSignal West Pico PLUS Chemiluminescent Substrate (Thermo Fisher, # 34580), then  
261 developed on Amersham hyperfilms (GE Healthcare, #28-9068-37) with CuriX 60 developer (Agfa).

262

263 **Mass cytometry staining**

264 Antibodies coupling: Anti-CTLA-4 (Cat# 369602, Biolegend) and anti-FAS (#555670, BD  
265 Biosciences) antibodies were coupled to 162Dy and 116Cd respectively using the kits #201162A  
266 (Fluidigm) and # 201116A (Fluidigm) according to manufacturer protocol.

267 Samples staining: Immune phenotyping on whole blood was carried out using the Maxpar Direct  
268 Immune Profiling kit (Fluidigm, Cat# 201325) with an antibody panel of 30 markers for CyTOF  
269 (Cytometry by Time Of Flight) analysis. To these 30 markers, 8 additional antibodies were added  
270 to detect FAS and certain immune checkpoints (TIM3, TIGIT, ICOS, GITR, PD-1, CTLA-4). 300 µL  
271 of heparinized whole blood were used per labeling. The cells were incubated for 20 min at room  
272 temperature (RT) with 3µL of heparin (Sigma Aldrich, Cat# H3149-10KU) at 10,000 U/mL and 5µL  
273 of Human TruStain FcX (Biolegend, Cat# 422302), then incubated for 30 min at RT with the  
274 antibody cocktail for extracellular labeling (except CTLA-4 for which intracellular labeling was  
275 necessary). Blood lysis was performed using Cell Cal-lyse buffer (Thermofischer, GAS-010S100)  
276 according to manufacturer instructions. After fixation and permeabilization using the Cytofix  
277 CytoPerm kit (#554714, BD) the CTLA-4 antibody was incubated with the cells for 30 min at RT.  
278 After washing, cells were fixed for 15 min with a 1.6% solution of FA (Formaldehyde, Thermo  
279 Fisher, Cat# 28906). Finally, cells were incubated in the Fix&Perm buffer (Fluidigm, Cat# 201325)  
280 with the Iridium intercalator at 1:1000 dilution (Fluidigm, Cat# 201325) overnight at 4°C. Cell  
281 solutions were frozen at -80°C prior to acquisition.

282 Acquisition: As previously described, acquisition were performed on Helios mass cytometer (37).  
283 For acquisition, cells were washed and resuspended at a concentration of 1.106/mL in Maxpar Cell  
284 Acquisition Solution, a high ion concentration solution, and mixed with 10% EQ beads (allowing for  
285 calibration automatic device) immediately before the acquisition. The acquisition of the events was  
286 carried out on the Helios mass cytometer (Fluidigm) coupled with the CyTOF software version  
287 6.7.1014 (Fluidigm) at the Pitié-792 Salpêtrière Cytometry Platform (CyPS). The acquired data  
288 were normalised using the Fluidigm normalisation algorithm. Cells were selected by cell selection  
289 (Ir191+Ir193+), cell doublets were removed (Time/offset, Time/width, Time/Centre and  
290 Time/residual) and dead cells were removed (Ir193+Rh103+). This selection is done automatically  
291 with the Pathsetter software.

292 Data analysis: FCS files containing viable singlet cells were uploaded in R version 4.0.3 using the  
293 flowCore package. All files were concatenated in a SingleCellExperiment (SCE) with the  
294 SingleCellExperiment package. After quality control (number of cells per sample, expression  
295 pattern of all markers across samples), all cells were submitted to clustering using the cluster  
296 function (FlowSOM and ConsensusMetaClustering) following recommendation from the  
297 CATALYST packages (38). For clustering, k parameter was set to 60 to detect small immune  
298 populations. Clusters were then identified based on their expression of type markers according to  
299 previous knowledge of immune cell phenotype and following manufacturer instruction from  
300 Fluidigm Maxpar Immune Profiling (38) (See heatmap in Fig. S2A). Clusters expressing the same  
301 type markers were merged into one single immune cell population. Proportion of clusters among  
302 all intact viable cells were then defined using appropriate function from CATALYST and compared  
303 between groups using Mann-Whitney test in R. To go further in the detail of memory CD4 T cells  
304 they were submitted to subclustering using CXCR3, CXCR5, CCR6 and CCR4 as type markers  
305 defining Th1-like, Th2-like, Th17-like and Tfh-like cells. Median expression intensity of markers of  
306 interest was assessed using the plotPbExprs from CATALYST package. Dimension reduction in  
307 UMAPs was performed using runDR function from CATALYST with neighbors set to 15 and  
308 minimum distance to 0.4. Marker intensity visualization on UMAPs was performed upon data  
309 normalization between 0 and 1. All other visualization was performed using in-house and ggplot2  
310 functions.

### 311 **Fas Ligand and Vitamin B12 assays**

312 Fas ligand (FASL) and Vitamin B12 dosages were performed on plasma samples. The FasL assay  
313 was performed with the ELISA kit (R&D, #DFL00), according to the supplier's recommendations.  
314 The vitamin B12 assay was performed using an "ECLIA" electrochemiluminescence immunoassay  
315 contained in the Elecsys® Active B12 (holoTC) kit (Roche, # 07 713 207 190), according to the  
316 supplier's recommendations.

317

318

319 **CRISPR Cas9 experiments**

320 Guide design: using the online tool CRISPOR (website: <http://crispor.tefor.net/>) (Concordet and  
321 Haeussler, 2018), six and five guides were designed for NBEAL2 and LRBA genes respectively  
322 and ordered via Integrated DNA Technologies with the format custom Alt R Cas9 gRNA, 10 nmol.  
323 The guides are listed in supplemental table S8.

324 T cells stimulation: T cells previously isolated from blood of healthy EFS donors were thawed and  
325 cultured at 500 000 cells/mL in Complete immunocult medium in flask previously coated with anti-  
326 CD3 antibody (UCHT1 clone, ThermoFischer Scientific Cat# 16-0038-85) at 0.3 µg/mL. Anti-CD28  
327 antibody (clone 28.2, Biolegend Cat# 302934) was added to the final concentration of 0.06 µg/mL.  
328 Cells were incubated at 37°C for 4 days.

329 Electroporation: On the 4th day, the cells were electroporated. Prior to electroporation, the  
330 ribonucleoprotein (RNP) complexes between the Cas9 enzyme (Alt-R Cas9 Nuclease V3, IDT, 10  
331 mg/ml, Mw: 162 kDa, #10000735) and the RNA guides were incubated for 20 min at room  
332 temperature, in a buffer containing no nucleases (IDT, #1072570). Electroporation enhancer buffer  
333 (IDT, #1075916) was resuspended in 100 nM nuclease-free buffer (IDT, #1072570). Nucleofector  
334 supplement was added to Nucleofector solution of P2 Primary Cell 4D X Kit S (LONZA #V4XP-  
335 2032). The pre-activated T cells were washed with PBS before electroporation. The cells were then  
336 resuspended in P2-4D Nucleofactor™ X Solution: 20µL/1.106 cells/electroporation. 1µL of  
337 electroporation enhancer and 5 µL of RNP solution were added for every 20 µL/electroporation.  
338 The cells were electroporated using the Amaxa™ 4D-Nucleofector nucleofaction system and the  
339 P2-EH100 program. Immediately after electroporation IC-C+IL-2 medium was added to the cells.  
340 Cells were incubated for four days at 37°C in IC-C+IL-2 medium.

341 Culture and cells reactivation: on day 7 following T cell activation, the cells were cultured by diluting  
342 them to 1/3 in IC-C+IL-2 medium. On day 8, the cells were restimulated with Dynabeads Human  
343 T-Activator CD3/CD28 at 1 beads/16 cells. The cells were transferred in 96-well plates at 100,000  
344 cells/100 µL of X-Vivo15 complete medium (Lonza, #BE02-061Q) and incubated at 37°C.

345 Cytometry staining and protein extraction: each day post re-stimulation, cells were labeled to  
346 analyze the expression of the immune checkpoints using the Cytex® Aurora cytometer CS  
347 according to the protocol described in cytometry staining paragraph. In parallel, after 72 hours after  
348 reactivation, cells were lysed for protein extraction as described in the “protein extraction” method  
349 paragraph.

350 **Flow cytometry staining**

351 Treg staining: PBMC were thawed, washed with PBS and stained. Extracellular staining was  
352 performed 30 min on ice using antibodies anti-CD3-PerCP-Cy5.5 ; CD4 BV510 ; CD127-FITC ;  
353 CD45RA Pe-Cy5 ; CD25 PE-Cy7. Cells were permeabilized and fixed with the kit Foxp3 /  
354 Transcription Factor Staining Buffer (eBioscience™ #00-5523-00), according to manufacturer

355 instructions. Intracellular staining was performed 1h on ice using antibodies anti-CTLA-4 PE; FoxP3  
356 APC; Helios eF450. Cells were resuspended in PBS and analyzed on the BD LSRFortessa™ X-  
357 20 SORP Cell Analyzer cytometer.

358 Activated T cells after CRISPR knock-down: Activated T cells were stained after electroporation  
359 and re-activation. Cells were stained for viability using LIVE/DEAD™ Fixable Blue Dead Cell Stain  
360 Kit, for UV excitation (Thermofischer, #L23105). Extracellular staining was carried out 30 min on  
361 ice using TCR – BV510, CD4 – YG594, CD8 – BV805, CD25 – PE-AF700. Cells were fixed and  
362 permeabilized using the Cytfix CytoPerm kit (#554714, BD). Intracellular staining was performed  
363 with antibody anti-CTLA-4 Pe-Dazzle. Cells were analyzed on the Aurora cytometer.

364 Activated T cells: After CD3/CD28 activation and 12 days of cultures, activated T cells were stained  
365 with Zombie NIR, TCRab, CD4, CD25, CD8. Cells were fixed and permeabilized using the Cytfix  
366 CytoPerm kit (#554714, BD). Intracellular staining was performed with antibody anti-CTLA-4  
367 BV421. Cells were analyzed on the Sony Biotechnology SP6800 Spectral Analyzer.

368 The mean of fluorescence intensities (MFI) of each sample was normalized using the mean MFI of  
369 the internal control (healthy donors of the day) and the following equation for the test samples  
370 (patients and healthy donors) :  $MFI_{\text{sample}} / MFI_{\text{mean\_controls\_of\_the\_day}}$ .

### 371 **CTLA-4 Immunoprecipitation**

372 Cells: T cells isolated from the blood of healthy donors were used. A comparison between non-  
373 activated T cells and T cells activated was carried out. Unstimulated T cells express little CTLA-4  
374 and served as a negative control for immunoprecipitation. Cell activation was performed with  
375 Dynabeads CD3/CD28 (ThermoFisher, # 11141D): 1 bead for 30 cells. Cell cultures were made at  
376 1.106 cells/mL at 37°C. in complete immunocult medium. After four days of culture, the activated  
377 T cells were counted and re-suspended in complete Immunocult medium with IL-2. On the 5th day,  
378 the cells were lysed. On the same day, the non-activated T cells were thawed and equilibrated for  
379 1 hour at 37° C.

380 Antibody coupling: the antibody anti-CTLA-4 (ref Ab251599, Abcam) at 0.998 mg/mL was coupled  
381 to agarose beads using the kit Thermo Pierce Direct IP kit (ThermoFisher, Cat# 26148) according  
382 to the supplier's instructions. After the last two washes, the beads were resuspended in 400µL of  
383 Conditioning Buffer 1x and stored at 4°C for 24 h.

384 Cross-linking and cell lysis: a reversible cross-linker was used to preserve protein-protein  
385 interactions: dithiobis[succinimidylpropionate] (DSP, ThermoFisher, Cat# 22586). DSP was diluted  
386 just before use in DMSO to a concentration of 10mg/mL. It was then diluted in PBS 1:25 (100 mL  
387 of DSP at 1 mM final). Cells were washed in cold PBS and resuspended in the 1mM DSP solution.  
388 Cells were incubated with the cross-linker for 30 min, at room temperature (RT), under agitation.  
389 Then 750 µL of 1M TRIS were added and stirred for 3 min at RT. After centrifugation (300g, 5min,  
390 4°C) the pellet was washed with cold PBS then the cells were centrifuged (600g, 5min, 4°C). The

391 pellets were resuspended in Octyl lysis buffer (see Supplemental Table S10). The solutions were  
392 sonicated 3 times for 10 seconds. 10  $\mu$ L of benzonase (Sigma, #E1014-25KU) was added. The  
393 lysates were incubated for 2 hours under agitation at 4°C. The lysates were centrifuged at 15000  
394 rcf, at 4°C for 15 min, then the supernatant was transferred to a new tube. A part of the lysate (100  
395  $\mu$ L, INPUT fraction) was frozen. Protein dosages were performed using the Pierce™ BCA Protein  
396 Assay Kit (Thermofisher, #23225).

397 Immunoprecipitation: the concentrations of the lysates were adjusted if necessary, according to the  
398 results of the protein assay. 15  $\mu$ g of beads coupled to the antibody were added to each condition.  
399 The lysates were shaken on a wheel in a cold room overnight. Tubes were centrifuged for 5 min,  
400 1200g, 4°C. 100  $\mu$ L of the supernatants (Flow-through) were retrieved. The rest of the supernatants  
401 were aspirated, and the pellets were washed with 10 mL of cold lysis buffer, then centrifuged at  
402 1200g, 5 min, at 4°C. Pellets were re-suspended in 400  $\mu$ L of cold lysis buffer and applied to Pierce  
403 Spin Cups columns (Thermofisher, #69700). Three washes were carried out with 400  $\mu$ L of lysis  
404 buffer with a 2 min centrifugation at 4°C 1200g. A solution of 1x Blue loading buffer (Cell Signaling  
405 Technologies, #56036S diluted in water) was prepared. 50  $\mu$ L were added to each column retaining  
406 the beads and incubated for 20 min at 60° C., under agitation. After centrifugation (5min, 5000g,  
407 RT), the eluate was recovered and 3 $\mu$ L of  $\beta$ -mercaptoethanol (Biorad, ref #1610710) was added.  
408 The eluates were then reduced for 5 min at 60° C, under agitation, then loaded on the gel.

409 Immunoblotting: the fractions of the initial protein lysates (input) as well as the fractions of the final  
410 eluates (flow-through) were denatured and reduced with Blue loading buffer and  $\beta$ -  
411 mercaptoethanol for 20 min at 60° C, under agitation. 4-15% midi gels (Biorad, #5671083) were  
412 used and migration of the samples for 1h30 at 180V was carried out in a 1x Tris Glycine SDS buffer  
413 (Biorad, #161-0732). Gels were soaked in a 20% ethanol bath for 2 min before transfer. The  
414 transfers were performed on nitrocellulose membranes (Trans-Blot Turbo Midi 0.2  $\mu$ m  
415 Nitrocellulose Transfer Packs, Biorad, #1704159) with the 2.5A, 25V, 15 min program on the Trans-  
416 Blot device. Blot® Turbo™ Transfer System (Biorad, #1704150). Staining with Ponceau red  
417 (Sigma, #P7170-1L) was performed, then this staining was washed with TBS 1X. The membranes  
418 were saturated with a 10% solution of milk (PanReac AppliChem, #A0830) in 1X TBST (Cell  
419 signaling, #9997). The incubations of the primary antibodies were carried out overnight at 4°C in a  
420 10% milk solution, TBST 1X: anti-NBEAL2 (Abcam, #Ab187162): dilution 1:1000 or CTLA-4  
421 (Abcam, #Ab237712): dilution 1:1000 or CTLA-4 (SantaCruz Biotechnology, #sc-376016): dilution  
422 1:200 or LRBA (Sigma Prestige, #HPA-023597): dilution 1 :1000. After two washes with 1X TBST  
423 and two washes with 1X TBS, the secondary antibodies coupled to HRP were diluted in the 10%  
424 milk solution and incubated for 1 hour, at RT, under agitation: Mouse monoclonal [SB62a] Anti-  
425 Rabbit IgG light chain (HRP), (Abcam, #ab99697): dilution 1:1000 or Goat anti-mouse IgG1 (HRP)  
426 (Sigma Aldrich, #AP192P): dilution 1:1000. After incubation, washes were performed. The  
427 substrates SuperSignal West Dura (Thermo #859024 + 859025) or Femto (Thermo #1859022 +  
428 1859023) were used. Membranes were revealed on ECL hyperfilms (Amersham, #28906836) on

429 the Optimax X-ray film processor (Protec) or using a scanning system Chemidoc MP imaging  
430 (Biorad). When a second revelation was necessary, membranes were stripped with a stripping  
431 buffer (Millipore, #2060-1) diluted in water to the 10th, incubation 15 min with agitation, at RT. Four  
432 washes were carried out then the membranes were blocked again with a 10% milk solution for 1  
433 hour with stirring at RT allowing a new incubation with a primary antibody can then be carried out.

434

#### 435 **NBEAL2 immunoprecipitation**

436 For NBEAL2 immunoprecipitation experiments, PBMC from healthy donor and NBEAL2 patients  
437 were activated for 7 days with CD3/CD28 beads in Panserin complete medium (as described  
438 above). The same protocol of immunoprecipitation was used. The agarose beads were coupled to  
439 the anti-NBEAL2 rabbit (Abcam, Cat# ab250919) using the Thermo Pierce Direct IP kit  
440 (ThermoFisher, ref 26148) according to supplier's instructions.

#### 441 **Proteomics analysis after NBEAL2 immunoprecipitation**

442 In gel digestion: NBEAL2 immunoprecipitation fractions were separated by SDS-PAGE (4-20%)  
443 under reducing conditions. Six gel bands covering the entire gel area were excised, reduced with  
444 DTT, alkylated with iodoacetamide and in-gel digested overnight with trypsin. Peptides were  
445 extracted with 50 mM ammonium bicarbonate and 50 % acetonitrile in 0.2 % formic acid, dried by  
446 evaporation in a speed-vac concentrator and resuspended in 60 µl of 0.2% formic acid for injection  
447 in LC-MS/MS.

448 Liquid Chromatography Mass Spectrometry analysis (LC-MS/MS): LC-MS/MS analyses were  
449 performed using a nano-ACQUITY Ultra-Performance LC system (Waters, Milford, MA) coupled to  
450 an Orbitrap Fusion Tribrid mass spectrometer (Thermo Fisher Scientific, San Jose, CA). LC  
451 separation was performed with a trapping column (nano-Acquity Symmetry C18, 100 Å, 5 µm, 180  
452 µm x 20 mm) at 15 µl/min flow rate and an analytical column (nano-Acquity BEH C18, 130 Å, 1.7  
453 µm, 75 µm x 250 mm) directly coupled to the ion source. The mobile phases for LC separation  
454 were 0.2% (v/v) formic acid in LC-MS grade water (solvent A) and 0.2% (v/v) formic acid in  
455 acetonitrile (solvent B). Peptides were separated at a 300 nl/min constant flow rate with a linear  
456 gradient of 5-85% solvent B for 120min for global proteome analysis. A full MS1 survey scan was  
457 acquired in the Orbitrap for m/z 325-1200 at a 50 ms maximum filling time and 2e5 ions. Resolution  
458 was set to 120k at m/z 200. Fragmentation was performed in HCD fragmentation cell (collision  
459 energy at 26%), with isolation of precursor ions in the quadrupole. Target ions previously selected  
460 for fragmentation were dynamically excluded for 50s with a relative mass window of ±10 ppm. The  
461 MS/MS selection threshold was set to 5e3 ion counts. The detection was performed in the Ion Trap  
462 with an Automatic Gain Control (AGC) of 2e4 target value and a 50 ms maximum injection time.  
463 Each sample was injected twice (technical replicate).



464 Data processing: DDA data were processed with MaxQuant software (Ver. 1.6.17.0, Max-Planck  
465 Institute of Biochemistry, Department of Proteomics and Signal Transduction, Munich). Database  
466 searching was performed against the human FASTA database downloaded from UniProtKB/Swiss-  
467 Prot. Interrogation of the databank was based on the following criteria: precursor mass tolerance  
468 of 7 ppm; fragment ions mass tolerance of 0.6 Da and 2 maximum missed cleavages with trypsin  
469 as the enzyme. Search parameters for post-translational modifications were variable modifications  
470 of N-acetylation on protein N-terminal residues, oxidation on methionine residues and pyro-Glu  
471 modification on glutamine residues. The matching between runs was also checked out. All the other  
472 parameters were MaxQuant default parameters. Protein intensities were exported from MaxQuant  
473 proteinGroups file. Missing values were replaced by the minimum value of each acquisition.  
474 Medians were calculated over the technical replicates.

475 Proteins selection: Seventy-six proteins with the highest probability to interact with NBEAL2 were  
476 selected as described in supplemental figure S3.

477 STRING and EnrichR analysis: the 74 selected proteins were mapped using the STRING database  
478 (23) (39). Enrichment analysis was performed using EnrichR (26) (40) webtool and the Jensen  
479 Tissue library (41)(42).

480

#### 481 **Treg and CD25- CD4+ T cells sorting**

482 Treg and CD25- CD4+ T cells were sorted from fresh healthy donor PBMC, using the EasySep™  
483 Human CD4+CD127lowCD25+ Regulatory T Cell Isolation Kit. Small amount of the sorted cells  
484 and initial PBMC fractions were stained as described in the Treg staining paragraph with TCRab –  
485 BV510, CD4 BV605, CD8a BV711, CD25 PE/Cy7, CD127 AFR700, CTLA-4 PE, FoxP3 APC,  
486 CD45RA BUV395 and Helios PerCPeF710 and acquired on Cytex® Aurora cytometer CS. After  
487 sorting, the Treg fraction and part of the CD25- CD4+ were lysed in octyl buffer, as described  
488 above. The rest of the CD25- CD4+ T cells were activated with CD3/CD28 beads for 5 days in  
489 Immunocult complete medium. After activation, cells were lysed. Immunoblotting was performed  
490 using 12-230kDa separation module on Jess system (Biotechne).

491

#### 492 **Single-cell RNA sequencing**

493 The scRNA-seq libraries were generated using Chromium Single Cell 3' Library & Gel Bead Kit v.2  
494 or kit v.3 or kit v.3.1 as previously described (37), (10x Genomics) according to the manufacturer's  
495 protocol. Briefly, cells were counted, diluted at 1000 cells/μL in PBS+0,04% and 20 000 cells were  
496 loaded in the 10x Chromium Controller to generate single-cell gel-beads in emulsion. After reverse  
497 transcription, gel-beads in emulsion were disrupted. Barcoded complementary DNA was isolated  
498 and amplified by PCR. Following fragmentation, end repair and A-tailing, sample indexes were  
499 added during index PCR. The purified libraries were sequenced on a Novaseq (Illumina) with 26

500 cycles of read 1, 8 cycles of i7 index and 98 cycles of read 2 (for kit v.2.) or with 28 cycles of read  
501 1, 8 cycles of i7 index and 91 cycles of read 2 (for kit v.3 and v.3.1).

## 502 **Single-cell RNA sequencing analysis**

503 Single-cell RNA sequencing analyses were performed as previously described (37).  
504 Sequencing reads were demultiplexed and aligned to the human reference transcriptome (GRCh38  
505 directly download from 10x), using the CellRanger Pipeline (v3.0.2). The unfiltered raw UMI counts  
506 from Cellranger were loaded into Seurat v4.0.4 (43) for quality control, data integration and  
507 downstream analyses. Duplets, empty sequencing beads and apoptotic cells were removed by  
508 filtering out cells with fewer than 500 features or a mitochondrial content higher than 20%. Data  
509 from each sample were normalized and scaled using the SCTransform method, and batch effect  
510 between samples was corrected using Seurat's FindIntegratingAnchors. The level of ambient  
511 mRNA present in the samples was calculated using SoupX with default settings. For each sample,  
512 the raw and filtered matrices from cellranger were loaded using the load10X function. The  
513 contamination fraction was calculated by combining the results of the automated method  
514 (autoEstCont function) with the manual one, in which immunoglobulin genes and other genes linked  
515 to contamination (PPBP, HBB and HBA1) were passed to estimateNonExpressingCells to estimate  
516 the contamination values. On this integrated dataset, we computed the principal component  
517 analysis on the 3000 most variable genes. UMAP was carried out using the 30 most significant  
518 PCs, and community detection was performed using the graph-based modularity-optimization  
519 Louvain algorithm from Seurat's FindClusters function with a 1.8 resolution. Cell type labels were  
520 assigned to resulting clusters based on a manually curated list of marker genes as well as  
521 previously defined signatures of the well-known PBMC subtypes (44). All clusters were annotated,  
522 and 134,776 cells were kept for further analysis. Differential expression was performed on different  
523 groups (all PBMCs, Myeloid cells, T cells, B cells, and their sub-populations), using the FindMarkers  
524 function of Seurat on the RNA assay with default parameters (Wilcoxon testing with Bonferroni  
525 correction). Only genes with adjusted p-values < 0.05 were selected as significant. The lists of  
526 differentially expressed genes were further divided into UP and DOWN regulated genes based on  
527 the avg\_log2FC; avg\_log2FC >0 for the UP regulated genes and avg\_log2FC <0 for the DOWN  
528 regulated ones. All differentially expressed genes with a avg\_log2FC > 1.2 or <-1.2 were selected  
529 for pathways analysis with the Ingenuity pathway analysis v57662101 software (IPA, QIAGEN Inc.)  
530 (45). Heatmaps were extracted from the comparison module in IPA. Pathways with an absolute z-  
531 score lower than 2 or a Bonferroni-Hochberg corrected p values higher than 0.05 were filtered out.  
532 From the Molecular Signatures Database (MsigDB), the genes in the IL6/JAK STAT3 gene set  
533 (HALLMARK\_IL6\_JAK\_STAT3\_SIGNALING) were used to calculate the signature scores using  
534 the AddModuleScore function from Seurat, and dot plots were used to group and visualize the  
535 change in signature signal between conditions (e.g. cell type, gene). Single-cell RNA-sequencing  
536 data are available at the GEO accession number GSE196606.

537 **Statistical analysis**

538 Comparisons among groups were performed using nonparametric Mann-Whitney tests or Kruskal-  
539 Wallis tests for multiple comparison, corrected with a Dunn test or Wilcoxon signed-rank tests using  
540 the Prism 9 software (GraphPad). Each test is specified in the figure legends. *p*-values are shown  
541 when relevant (\*) *p*-value < 0.05; (\*\*) *p*-value < 0.01; (\*\*\*) *p*-value < 0.005 ; (\*\*\*\*) *p*-value < 0.0001.
